# Supplementary material for: Creating Neuroscientific Knowledge Organization System Based on Word Representation and Agglomerative Clustering Algorithm
Source: Front Neuroinform. 2020 Aug 18;14:38. doi: 10.3389/fninf.2020.00038 (PMC7461893; doi:10.3389/fninf.2020.00038)
Supplement: Supplementary file 4 [file Data_Sheet_1.CSV]

0 76072
0 0 76070
0 0 0 76050
0 0 0 0 76007
0 0 0 0 0 75547
0 0 0 0 0 0 70665
0 0 0 0 0 0 0 splenectomy
0 0 0 0 0 0 1 66604
0 0 0 0 0 0 1 0 castration
0 0 0 0 0 0 1 1 63947
0 0 0 0 0 0 1 1 0 adrenalectomy
0 0 0 0 0 0 1 1 1 pinealectomy
0 0 0 0 0 1 73330
0 0 0 0 0 1 0 surgical ablation
0 0 0 0 0 1 1 69373
0 0 0 0 0 1 1 0 learning curve
0 0 0 0 0 1 1 1 procedural
0 0 0 0 1 75967
0 0 0 0 1 0 75868
0 0 0 0 1 0 0 74676
0 0 0 0 1 0 0 0 70864
0 0 0 0 1 0 0 0 0 67229
0 0 0 0 1 0 0 0 0 0 efferocytosis
0 0 0 0 1 0 0 0 0 1 50942
0 0 0 0 1 0 0 0 0 1 0 phagocytes
0 0 0 0 1 0 0 0 0 1 1 phagocyte
0 0 0 0 1 0 0 0 1 67583
0 0 0 0 1 0 0 0 1 0 pcd
0 0 0 0 1 0 0 0 1 1 60581
0 0 0 0 1 0 0 0 1 1 0 engulfment
0 0 0 0 1 0 0 0 1 1 1 phagoptosis
0 0 0 0 1 0 0 1 73135
0 0 0 0 1 0 0 1 0 61153
0 0 0 0 1 0 0 1 0 0 anoikis
0 0 0 0 1 0 0 1 0 1 dependence receptor
0 0 0 0 1 0 0 1 1 68098
0 0 0 0 1 0 0 1 1 0 57469
0 0 0 0 1 0 0 1 1 0 0 death
0 0 0 0 1 0 0 1 1 0 1 surviving
0 0 0 0 1 0 0 1 1 1 59730
0 0 0 0 1 0 0 1 1 1 0 anastasis
0 0 0 0 1 0 0 1 1 1 1 compensatory proliferation
0 0 0 0 1 0 1 75132
0 0 0 0 1 0 1 0 71980
0 0 0 0 1 0 1 0 0 62306
0 0 0 0 1 0 1 0 0 0 thought
0 0 0 0 1 0 1 0 0 1 46963
0 0 0 0 1 0 1 0 0 1 0 cascade
0 0 0 0 1 0 1 0 0 1 1 trigger
0 0 0 0 1 0 1 0 1 68432
0 0 0 0 1 0 1 0 1 0 place
0 0 0 0 1 0 1 0 1 1 48148
0 0 0 0 1 0 1 0 1 1 0 process
0 0 0 0 1 0 1 0 1 1 1 38837
0 0 0 0 1 0 1 0 1 1 1 0 step
0 0 0 0 1 0 1 0 1 1 1 1 steps
0 0 0 0 1 0 1 1 74804
0 0 0 0 1 0 1 1 0 70385
0 0 0 0 1 0 1 1 0 0 stopping
0 0 0 0 1 0 1 1 0 1 point of no return
0 0 0 0 1 0 1 1 1 73697
0 0 0 0 1 0 1 1 1 0 65469
0 0 0 0 1 0 1 1 1 0 0 bypass
0 0 0 0 1 0 1 1 1 0 1 route
0 0 0 0 1 0 1 1 1 1 67800
0 0 0 0 1 0 1 1 1 1 0 escape
0 0 0 0 1 0 1 1 1 1 1 reach
0 0 0 0 1 1 75896
0 0 0 0 1 1 0 75823
0 0 0 0 1 1 0 0 75520
0 0 0 0 1 1 0 0 0 73917
0 0 0 0 1 1 0 0 0 0 69862
0 0 0 0 1 1 0 0 0 0 0 functional adaptation
0 0 0 0 1 1 0 0 0 0 1 62104
0 0 0 0 1 1 0 0 0 0 1 0 50910
0 0 0 0 1 1 0 0 0 0 1 0 0 adaptive
0 0 0 0 1 1 0 0 0 0 1 0 1 adaptive response
0 0 0 0 1 1 0 0 0 0 1 1 57089
0 0 0 0 1 1 0 0 0 0 1 1 0 compensation
0 0 0 0 1 1 0 0 0 0 1 1 1 39070
0 0 0 0 1 1 0 0 0 0 1 1 1 0 compensatory mechanisms
0 0 0 0 1 1 0 0 0 0 1 1 1 1 38637
0 0 0 0 1 1 0 0 0 0 1 1 1 1 0 compensatory
0 0 0 0 1 1 0 0 0 0 1 1 1 1 1 compensatory mechanism
0 0 0 0 1 1 0 0 0 1 72040
0 0 0 0 1 1 0 0 0 1 0 cognitive capacity
0 0 0 0 1 1 0 0 0 1 1 71519
0 0 0 0 1 1 0 0 0 1 1 0 reserve
0 0 0 0 1 1 0 0 0 1 1 1 69164
0 0 0 0 1 1 0 0 0 1 1 1 0 61684
0 0 0 0 1 1 0 0 0 1 1 1 0 0 neural compensation
0 0 0 0 1 1 0 0 0 1 1 1 0 1 50167
0 0 0 0 1 1 0 0 0 1 1 1 0 1 0 neural reserve
0 0 0 0 1 1 0 0 0 1 1 1 0 1 1 43133
0 0 0 0 1 1 0 0 0 1 1 1 0 1 1 0 cognitive reserve
0 0 0 0 1 1 0 0 0 1 1 1 0 1 1 1 brain reserve
0 0 0 0 1 1 0 0 0 1 1 1 1 66317
0 0 0 0 1 1 0 0 0 1 1 1 1 0 neural efficiency
0 0 0 0 1 1 0 0 0 1 1 1 1 1 54066
0 0 0 0 1 1 0 0 0 1 1 1 1 1 0 over-recruitment
0 0 0 0 1 1 0 0 0 1 1 1 1 1 1 crunch
0 0 0 0 1 1 0 0 1 75233
0 0 0 0 1 1 0 0 1 0 73926
0 0 0 0 1 1 0 0 1 0 0 68839
0 0 0 0 1 1 0 0 1 0 0 0 inactivity
0 0 0 0 1 1 0 0 1 0 0 1 58544
0 0 0 0 1 1 0 0 1 0 0 1 0 disuse
0 0 0 0 1 1 0 0 1 0 0 1 1 unloading
0 0 0 0 1 1 0 0 1 0 1 73118
0 0 0 0 1 1 0 0 1 0 1 0 67185
0 0 0 0 1 1 0 0 1 0 1 0 0 overtraining
0 0 0 0 1 1 0 0 1 0 1 0 1 overload
0 0 0 0 1 1 0 0 1 0 1 1 67589
0 0 0 0 1 1 0 0 1 0 1 1 0 load
0 0 0 0 1 1 0 0 1 0 1 1 1 exhaustion
0 0 0 0 1 1 0 0 1 1 74671
0 0 0 0 1 1 0 0 1 1 0 70449
0 0 0 0 1 1 0 0 1 1 0 0 59737
0 0 0 0 1 1 0 0 1 1 0 0 0 hypofrontality
0 0 0 0 1 1 0 0 1 1 0 0 1 hypodopaminergia
0 0 0 0 1 1 0 0 1 1 0 1 66495
0 0 0 0 1 1 0 0 1 1 0 1 0 disconnection syndrome
0 0 0 0 1 1 0 0 1 1 0 1 1 56264
0 0 0 0 1 1 0 0 1 1 0 1 1 0 hyperconnectivity
0 0 0 0 1 1 0 0 1 1 0 1 1 1 53449
0 0 0 0 1 1 0 0 1 1 0 1 1 1 0 dysconnectivity
0 0 0 0 1 1 0 0 1 1 0 1 1 1 1 underconnectivity
0 0 0 0 1 1 0 0 1 1 1 74092
0 0 0 0 1 1 0 0 1 1 1 0 71466
0 0 0 0 1 1 0 0 1 1 1 0 0 61092
0 0 0 0 1 1 0 0 1 1 1 0 0 0 integrity
0 0 0 0 1 1 0 0 1 1 1 0 0 1 preservation
0 0 0 0 1 1 0 0 1 1 1 0 1 64897
0 0 0 0 1 1 0 0 1 1 1 0 1 0 instability
0 0 0 0 1 1 0 0 1 1 1 0 1 1 stabilization
0 0 0 0 1 1 0 0 1 1 1 1 72678
0 0 0 0 1 1 0 0 1 1 1 1 0 65030
0 0 0 0 1 1 0 0 1 1 1 1 0 0 58503
0 0 0 0 1 1 0 0 1 1 1 1 0 0 0 45336
0 0 0 0 1 1 0 0 1 1 1 1 0 0 0 0 disruption
0 0 0 0 1 1 0 0 1 1 1 1 0 0 0 1 disorganization
0 0 0 0 1 1 0 0 1 1 1 1 0 0 1 48304
0 0 0 0 1 1 0 0 1 1 1 1 0 0 1 0 39047
0 0 0 0 1 1 0 0 1 1 1 1 0 0 1 0 0 impairment
0 0 0 0 1 1 0 0 1 1 1 1 0 0 1 0 1 38165
0 0 0 0 1 1 0 0 1 1 1 1 0 0 1 0 1 0 deficits
0 0 0 0 1 1 0 0 1 1 1 1 0 0 1 0 1 1 deficit
0 0 0 0 1 1 0 0 1 1 1 1 0 0 1 1 39136
0 0 0 0 1 1 0 0 1 1 1 1 0 0 1 1 0 abnormalities
0 0 0 0 1 1 0 0 1 1 1 1 0 0 1 1 1 defects
0 0 0 0 1 1 0 0 1 1 1 1 0 1 62832
0 0 0 0 1 1 0 0 1 1 1 1 0 1 0 52493
0 0 0 0 1 1 0 0 1 1 1 1 0 1 0 0 disinhibition
0 0 0 0 1 1 0 0 1 1 1 1 0 1 0 1 39224
0 0 0 0 1 1 0 0 1 1 1 1 0 1 0 1 0 hyperactivity
0 0 0 0 1 1 0 0 1 1 1 1 0 1 0 1 1 hypoactivity
0 0 0 0 1 1 0 0 1 1 1 1 0 1 1 56573
0 0 0 0 1 1 0 0 1 1 1 1 0 1 1 0 overactive
0 0 0 0 1 1 0 0 1 1 1 1 0 1 1 1 48846
0 0 0 0 1 1 0 0 1 1 1 1 0 1 1 1 0 hyperactivation
0 0 0 0 1 1 0 0 1 1 1 1 0 1 1 1 1 39043
0 0 0 0 1 1 0 0 1 1 1 1 0 1 1 1 1 0 dysfunction
0 0 0 0 1 1 0 0 1 1 1 1 0 1 1 1 1 1 dysregulation
0 0 0 0 1 1 0 0 1 1 1 1 1 68889
0 0 0 0 1 1 0 0 1 1 1 1 1 0 39881
0 0 0 0 1 1 0 0 1 1 1 1 1 0 0 loss
0 0 0 0 1 1 0 0 1 1 1 1 1 0 1 losses
0 0 0 0 1 1 0 0 1 1 1 1 1 1 60513
0 0 0 0 1 1 0 0 1 1 1 1 1 1 0 improvement
0 0 0 0 1 1 0 0 1 1 1 1 1 1 1 46666
0 0 0 0 1 1 0 0 1 1 1 1 1 1 1 0 progressive
0 0 0 0 1 1 0 0 1 1 1 1 1 1 1 1 39617
0 0 0 0 1 1 0 0 1 1 1 1 1 1 1 1 0 deterioration
0 0 0 0 1 1 0 0 1 1 1 1 1 1 1 1 1 decline
0 0 0 0 1 1 0 1 75702
0 0 0 0 1 1 0 1 0 74898
0 0 0 0 1 1 0 1 0 0 73145
0 0 0 0 1 1 0 1 0 0 0 40261
0 0 0 0 1 1 0 1 0 0 0 0 endogenous
0 0 0 0 1 1 0 1 0 0 0 1 exogenous
0 0 0 0 1 1 0 1 0 0 1 67344
0 0 0 0 1 1 0 1 0 0 1 0 presence
0 0 0 0 1 1 0 1 0 0 1 1 addition
0 0 0 0 1 1 0 1 0 1 74652
0 0 0 0 1 1 0 1 0 1 0 71885
0 0 0 0 1 1 0 1 0 1 0 0 67654
0 0 0 0 1 1 0 1 0 1 0 0 0 induction
0 0 0 0 1 1 0 1 0 1 0 0 1 61921
0 0 0 0 1 1 0 1 0 1 0 0 1 0 post-treatment
0 0 0 0 1 1 0 1 0 1 0 0 1 1 50179
0 0 0 0 1 1 0 1 0 1 0 0 1 1 0 induced
0 0 0 0 1 1 0 1 0 1 0 0 1 1 1 41948
0 0 0 0 1 1 0 1 0 1 0 0 1 1 1 0 pretreatment
0 0 0 0 1 1 0 1 0 1 0 0 1 1 1 1 dose-dependent
0 0 0 0 1 1 0 1 0 1 0 1 70723
0 0 0 0 1 1 0 1 0 1 0 1 0 65882
0 0 0 0 1 1 0 1 0 1 0 1 0 0 46444
0 0 0 0 1 1 0 1 0 1 0 1 0 0 0 restoration
0 0 0 0 1 1 0 1 0 1 0 1 0 0 1 rescue
0 0 0 0 1 1 0 1 0 1 0 1 0 1 57267
0 0 0 0 1 1 0 1 0 1 0 1 0 1 0 augmentation
0 0 0 0 1 1 0 1 0 1 0 1 0 1 1 51597
0 0 0 0 1 1 0 1 0 1 0 1 0 1 1 0 attenuation
0 0 0 0 1 1 0 1 0 1 0 1 0 1 1 1 48956
0 0 0 0 1 1 0 1 0 1 0 1 0 1 1 1 0 suppression
0 0 0 0 1 1 0 1 0 1 0 1 0 1 1 1 1 enhancement
0 0 0 0 1 1 0 1 0 1 0 1 1 69227
0 0 0 0 1 1 0 1 0 1 0 1 1 0 63841
0 0 0 0 1 1 0 1 0 1 0 1 1 0 0 54003
0 0 0 0 1 1 0 1 0 1 0 1 1 0 0 0 48573
0 0 0 0 1 1 0 1 0 1 0 1 1 0 0 0 0 reduction
0 0 0 0 1 1 0 1 0 1 0 1 1 0 0 0 1 elevation
0 0 0 0 1 1 0 1 0 1 0 1 1 0 0 1 50106
0 0 0 0 1 1 0 1 0 1 0 1 1 0 0 1 0 activation
0 0 0 0 1 1 0 1 0 1 0 1 1 0 0 1 1 38218
0 0 0 0 1 1 0 1 0 1 0 1 1 0 0 1 1 0 38058
0 0 0 0 1 1 0 1 0 1 0 1 1 0 0 1 1 0 0 down-regulation
0 0 0 0 1 1 0 1 0 1 0 1 1 0 0 1 1 0 1 up-regulation
0 0 0 0 1 1 0 1 0 1 0 1 1 0 0 1 1 1 38066
0 0 0 0 1 1 0 1 0 1 0 1 1 0 0 1 1 1 0 upregulation
0 0 0 0 1 1 0 1 0 1 0 1 1 0 0 1 1 1 1 downregulation
0 0 0 0 1 1 0 1 0 1 0 1 1 0 1 61589
0 0 0 0 1 1 0 1 0 1 0 1 1 0 1 0 48545
0 0 0 0 1 1 0 1 0 1 0 1 1 0 1 0 0 inactivation
0 0 0 0 1 1 0 1 0 1 0 1 1 0 1 0 1 ablation
0 0 0 0 1 1 0 1 0 1 0 1 1 0 1 1 51562
0 0 0 0 1 1 0 1 0 1 0 1 1 0 1 1 0 41136
0 0 0 0 1 1 0 1 0 1 0 1 1 0 1 1 0 0 deficiency
0 0 0 0 1 1 0 1 0 1 0 1 1 0 1 1 0 1 depletion
0 0 0 0 1 1 0 1 0 1 0 1 1 0 1 1 1 48035
0 0 0 0 1 1 0 1 0 1 0 1 1 0 1 1 1 0 39740
0 0 0 0 1 1 0 1 0 1 0 1 1 0 1 1 1 0 0 knock down
0 0 0 0 1 1 0 1 0 1 0 1 1 0 1 1 1 0 1 38359
0 0 0 0 1 1 0 1 0 1 0 1 1 0 1 1 1 0 1 0 knockdown
0 0 0 0 1 1 0 1 0 1 0 1 1 0 1 1 1 0 1 1 silencing
0 0 0 0 1 1 0 1 0 1 0 1 1 0 1 1 1 1 42329
0 0 0 0 1 1 0 1 0 1 0 1 1 0 1 1 1 1 0 ectopic expression
0 0 0 0 1 1 0 1 0 1 0 1 1 0 1 1 1 1 1 38183
0 0 0 0 1 1 0 1 0 1 0 1 1 0 1 1 1 1 1 0 overexpression
0 0 0 0 1 1 0 1 0 1 0 1 1 0 1 1 1 1 1 1 over-expression
0 0 0 0 1 1 0 1 0 1 0 1 1 1 68044
0 0 0 0 1 1 0 1 0 1 0 1 1 1 0 ectopic
0 0 0 0 1 1 0 1 0 1 0 1 1 1 1 38273
0 0 0 0 1 1 0 1 0 1 0 1 1 1 1 0 co-expression
0 0 0 0 1 1 0 1 0 1 0 1 1 1 1 1 coexpression
0 0 0 0 1 1 0 1 0 1 1 72426
0 0 0 0 1 1 0 1 0 1 1 0 70351
0 0 0 0 1 1 0 1 0 1 1 0 0 55477
0 0 0 0 1 1 0 1 0 1 1 0 0 0 conversion
0 0 0 0 1 1 0 1 0 1 1 0 0 1 hydrolysis
0 0 0 0 1 1 0 1 0 1 1 0 1 63221
0 0 0 0 1 1 0 1 0 1 1 0 1 0 mobilization
0 0 0 0 1 1 0 1 0 1 1 0 1 1 43042
0 0 0 0 1 1 0 1 0 1 1 0 1 1 0 secretion
0 0 0 0 1 1 0 1 0 1 1 0 1 1 1 release
0 0 0 0 1 1 0 1 0 1 1 1 70771
0 0 0 0 1 1 0 1 0 1 1 1 0 54817
0 0 0 0 1 1 0 1 0 1 1 1 0 0 removal
0 0 0 0 1 1 0 1 0 1 1 1 0 1 43454
0 0 0 0 1 1 0 1 0 1 1 1 0 1 0 clearance
0 0 0 0 1 1 0 1 0 1 1 1 0 1 1 elimination
0 0 0 0 1 1 0 1 0 1 1 1 1 62126
0 0 0 0 1 1 0 1 0 1 1 1 1 0 mislocalization
0 0 0 0 1 1 0 1 0 1 1 1 1 1 57345
0 0 0 0 1 1 0 1 0 1 1 1 1 1 0 sequestration
0 0 0 0 1 1 0 1 0 1 1 1 1 1 1 accumulation
0 0 0 0 1 1 0 1 1 75270
0 0 0 0 1 1 0 1 1 0 72047
0 0 0 0 1 1 0 1 1 0 0 63349
0 0 0 0 1 1 0 1 1 0 0 0 expansion
0 0 0 0 1 1 0 1 1 0 0 1 clonal expansion
0 0 0 0 1 1 0 1 1 0 1 65779
0 0 0 0 1 1 0 1 1 0 1 0 renewal
0 0 0 0 1 1 0 1 1 0 1 1 61414
0 0 0 0 1 1 0 1 1 0 1 1 0 turnover
0 0 0 0 1 1 0 1 1 0 1 1 1 cell turnover
0 0 0 0 1 1 0 1 1 1 74947
0 0 0 0 1 1 0 1 1 1 0 72987
0 0 0 0 1 1 0 1 1 1 0 0 53440
0 0 0 0 1 1 0 1 1 1 0 0 0 maturation
0 0 0 0 1 1 0 1 1 1 0 0 1 immature
0 0 0 0 1 1 0 1 1 1 0 1 65336
0 0 0 0 1 1 0 1 1 1 0 1 0 47537
0 0 0 0 1 1 0 1 1 1 0 1 0 0 structural changes
0 0 0 0 1 1 0 1 1 1 0 1 0 1 morphological changes
0 0 0 0 1 1 0 1 1 1 0 1 1 55605
0 0 0 0 1 1 0 1 1 1 0 1 1 0 38820
0 0 0 0 1 1 0 1 1 1 0 1 1 0 0 remodeling
0 0 0 0 1 1 0 1 1 1 0 1 1 0 1 remodelling
0 0 0 0 1 1 0 1 1 1 0 1 1 1 44565
0 0 0 0 1 1 0 1 1 1 0 1 1 1 0 reorganization
0 0 0 0 1 1 0 1 1 1 0 1 1 1 1 rearrangement
0 0 0 0 1 1 0 1 1 1 1 73560
0 0 0 0 1 1 0 1 1 1 1 0 71121
0 0 0 0 1 1 0 1 1 1 1 0 0 delamination
0 0 0 0 1 1 0 1 1 1 1 0 1 61191
0 0 0 0 1 1 0 1 1 1 1 0 1 0 extension
0 0 0 0 1 1 0 1 1 1 1 0 1 1 57246
0 0 0 0 1 1 0 1 1 1 1 0 1 1 0 elongation
0 0 0 0 1 1 0 1 1 1 1 0 1 1 1 retraction
0 0 0 0 1 1 0 1 1 1 1 1 71225
0 0 0 0 1 1 0 1 1 1 1 1 0 66407
0 0 0 0 1 1 0 1 1 1 1 1 0 0 dissolution
0 0 0 0 1 1 0 1 1 1 1 1 0 1 supersaturation
0 0 0 0 1 1 0 1 1 1 1 1 1 70042
0 0 0 0 1 1 0 1 1 1 1 1 1 0 crosslinking
0 0 0 0 1 1 0 1 1 1 1 1 1 1 60840
0 0 0 0 1 1 0 1 1 1 1 1 1 1 0 52395
0 0 0 0 1 1 0 1 1 1 1 1 1 1 0 0 assembly
0 0 0 0 1 1 0 1 1 1 1 1 1 1 0 1 formation
0 0 0 0 1 1 0 1 1 1 1 1 1 1 1 57457
0 0 0 0 1 1 0 1 1 1 1 1 1 1 1 0 self-assembly
0 0 0 0 1 1 0 1 1 1 1 1 1 1 1 1 54683
0 0 0 0 1 1 0 1 1 1 1 1 1 1 1 1 0 polymerization
0 0 0 0 1 1 0 1 1 1 1 1 1 1 1 1 1 nucleation
0 0 0 0 1 1 1 75848
0 0 0 0 1 1 1 0 74888
0 0 0 0 1 1 1 0 0 71035
0 0 0 0 1 1 1 0 0 0 prior
0 0 0 0 1 1 1 0 0 1 67234
0 0 0 0 1 1 1 0 0 1 0 41930
0 0 0 0 1 1 1 0 0 1 0 0 hrs
0 0 0 0 1 1 1 0 0 1 0 1 hr
0 0 0 0 1 1 1 0 0 1 1 43625
0 0 0 0 1 1 1 0 0 1 1 0 time
0 0 0 0 1 1 1 0 0 1 1 1 period
0 0 0 0 1 1 1 0 1 74642
0 0 0 0 1 1 1 0 1 0 time cells
0 0 0 0 1 1 1 0 1 1 70539
0 0 0 0 1 1 1 0 1 1 0 mtt
0 0 0 0 1 1 1 0 1 1 1 incubation period
0 0 0 0 1 1 1 1 75637
0 0 0 0 1 1 1 1 0 75380
0 0 0 0 1 1 1 1 0 0 74956
0 0 0 0 1 1 1 1 0 0 0 73188
0 0 0 0 1 1 1 1 0 0 0 0 68785
0 0 0 0 1 1 1 1 0 0 0 0 0 47255
0 0 0 0 1 1 1 1 0 0 0 0 0 0 time window
0 0 0 0 1 1 1 1 0 0 0 0 0 1 temporal window
0 0 0 0 1 1 1 1 0 0 0 0 1 50013
0 0 0 0 1 1 1 1 0 0 0 0 1 0 onset
0 0 0 0 1 1 1 1 0 0 0 0 1 1 onset time
0 0 0 0 1 1 1 1 0 0 0 1 69270
0 0 0 0 1 1 1 1 0 0 0 1 0 delayed response
0 0 0 0 1 1 1 1 0 0 0 1 1 46214
0 0 0 0 1 1 1 1 0 0 0 1 1 0 delay
0 0 0 0 1 1 1 1 0 0 0 1 1 1 time delay
0 0 0 0 1 1 1 1 0 0 1 74334
0 0 0 0 1 1 1 1 0 0 1 0 66021
0 0 0 0 1 1 1 1 0 0 1 0 0 persistence
0 0 0 0 1 1 1 1 0 0 1 0 1 55939
0 0 0 0 1 1 1 1 0 0 1 0 1 0 duration
0 0 0 0 1 1 1 1 0 0 1 0 1 1 chronicity
0 0 0 0 1 1 1 1 0 0 1 1 72162
0 0 0 0 1 1 1 1 0 0 1 1 0 undershoot
0 0 0 0 1 1 1 1 0 0 1 1 1 65312
0 0 0 0 1 1 1 1 0 0 1 1 1 0 repolarization
0 0 0 0 1 1 1 1 0 0 1 1 1 1 56467
0 0 0 0 1 1 1 1 0 0 1 1 1 1 0 refractoriness
0 0 0 0 1 1 1 1 0 0 1 1 1 1 1 refractory period
0 0 0 0 1 1 1 1 0 1 74998
0 0 0 0 1 1 1 1 0 1 0 69619
0 0 0 0 1 1 1 1 0 1 0 0 episodic
0 0 0 0 1 1 1 1 0 1 0 1 64064
0 0 0 0 1 1 1 1 0 1 0 1 0 repetitive
0 0 0 0 1 1 1 1 0 1 0 1 1 44973
0 0 0 0 1 1 1 1 0 1 0 1 1 0 continuous
0 0 0 0 1 1 1 1 0 1 0 1 1 1 intermittent
0 0 0 0 1 1 1 1 0 1 1 74438
0 0 0 0 1 1 1 1 0 1 1 0 68818
0 0 0 0 1 1 1 1 0 1 1 0 0 38694
0 0 0 0 1 1 1 1 0 1 1 0 0 0 timescale
0 0 0 0 1 1 1 1 0 1 1 0 0 1 timescales
0 0 0 0 1 1 1 1 0 1 1 0 1 63337
0 0 0 0 1 1 1 1 0 1 1 0 1 0 robust
0 0 0 0 1 1 1 1 0 1 1 0 1 1 45440
0 0 0 0 1 1 1 1 0 1 1 0 1 1 0 rapid
0 0 0 0 1 1 1 1 0 1 1 0 1 1 1 fast
0 0 0 0 1 1 1 1 0 1 1 1 72846
0 0 0 0 1 1 1 1 0 1 1 1 0 67531
0 0 0 0 1 1 1 1 0 1 1 1 0 0 52364
0 0 0 0 1 1 1 1 0 1 1 1 0 0 0 lead
0 0 0 0 1 1 1 1 0 1 1 1 0 0 1 led
0 0 0 0 1 1 1 1 0 1 1 1 0 1 61251
0 0 0 0 1 1 1 1 0 1 1 1 0 1 0 premature
0 0 0 0 1 1 1 1 0 1 1 1 0 1 1 failure
0 0 0 0 1 1 1 1 0 1 1 1 1 71340
0 0 0 0 1 1 1 1 0 1 1 1 1 0 48905
0 0 0 0 1 1 1 1 0 1 1 1 1 0 0 reversible
0 0 0 0 1 1 1 1 0 1 1 1 1 0 1 reversibility
0 0 0 0 1 1 1 1 0 1 1 1 1 1 69940
0 0 0 0 1 1 1 1 0 1 1 1 1 1 0 exacerbation
0 0 0 0 1 1 1 1 0 1 1 1 1 1 1 66517
0 0 0 0 1 1 1 1 0 1 1 1 1 1 1 0 rebound
0 0 0 0 1 1 1 1 0 1 1 1 1 1 1 1 64356
0 0 0 0 1 1 1 1 0 1 1 1 1 1 1 1 0 55461
0 0 0 0 1 1 1 1 0 1 1 1 1 1 1 1 0 0 arrest
0 0 0 0 1 1 1 1 0 1 1 1 1 1 1 1 0 1 54333
0 0 0 0 1 1 1 1 0 1 1 1 1 1 1 1 0 1 0 cessation
0 0 0 0 1 1 1 1 0 1 1 1 1 1 1 1 0 1 1 delayed
0 0 0 0 1 1 1 1 0 1 1 1 1 1 1 1 1 61335
0 0 0 0 1 1 1 1 0 1 1 1 1 1 1 1 1 0 sudden
0 0 0 0 1 1 1 1 0 1 1 1 1 1 1 1 1 1 40150
0 0 0 0 1 1 1 1 0 1 1 1 1 1 1 1 1 1 0 transient
0 0 0 0 1 1 1 1 0 1 1 1 1 1 1 1 1 1 1 sustained
0 0 0 0 1 1 1 1 1 75425
0 0 0 0 1 1 1 1 1 0 72776
0 0 0 0 1 1 1 1 1 0 0 57139
0 0 0 0 1 1 1 1 1 0 0 0 39703
0 0 0 0 1 1 1 1 1 0 0 0 0 chronic
0 0 0 0 1 1 1 1 1 0 0 0 1 acute
0 0 0 0 1 1 1 1 1 0 0 1 50002
0 0 0 0 1 1 1 1 1 0 0 1 0 subacute
0 0 0 0 1 1 1 1 1 0 0 1 1 acute phase
0 0 0 0 1 1 1 1 1 0 1 70691
0 0 0 0 1 1 1 1 1 0 1 0 61981
0 0 0 0 1 1 1 1 1 0 1 0 0 47101
0 0 0 0 1 1 1 1 1 0 1 0 0 0 40869
0 0 0 0 1 1 1 1 1 0 1 0 0 0 0 long term
0 0 0 0 1 1 1 1 1 0 1 0 0 0 1 38684
0 0 0 0 1 1 1 1 1 0 1 0 0 0 1 0 long-term
0 0 0 0 1 1 1 1 1 0 1 0 0 0 1 1 short-term
0 0 0 0 1 1 1 1 1 0 1 0 0 1 41319
0 0 0 0 1 1 1 1 1 0 1 0 0 1 0 long-term effects
0 0 0 0 1 1 1 1 1 0 1 0 0 1 1 long-term effect
0 0 0 0 1 1 1 1 1 0 1 0 1 47629
0 0 0 0 1 1 1 1 1 0 1 0 1 0 acute effects
0 0 0 0 1 1 1 1 1 0 1 0 1 1 chronic effects
0 0 0 0 1 1 1 1 1 0 1 1 67584
0 0 0 0 1 1 1 1 1 0 1 1 0 41470
0 0 0 0 1 1 1 1 1 0 1 1 0 0 low-dose
0 0 0 0 1 1 1 1 1 0 1 1 0 1 low dose
0 0 0 0 1 1 1 1 1 0 1 1 1 64951
0 0 0 0 1 1 1 1 1 0 1 1 1 0 38518
0 0 0 0 1 1 1 1 1 0 1 1 1 0 0 chronic treatment
0 0 0 0 1 1 1 1 1 0 1 1 1 0 1 chronic administration
0 0 0 0 1 1 1 1 1 0 1 1 1 1 46372
0 0 0 0 1 1 1 1 1 0 1 1 1 1 0 chronic exposure
0 0 0 0 1 1 1 1 1 0 1 1 1 1 1 prolonged exposure
0 0 0 0 1 1 1 1 1 1 73664
0 0 0 0 1 1 1 1 1 1 0 global effect
0 0 0 0 1 1 1 1 1 1 1 cumulative effect
0 0 0 1 76029
0 0 0 1 0 75929
0 0 0 1 0 0 75733
0 0 0 1 0 0 0 69020
0 0 0 1 0 0 0 0 differential
0 0 0 1 0 0 0 1 52913
0 0 0 1 0 0 0 1 0 interference
0 0 0 1 0 0 0 1 1 dic
0 0 0 1 0 0 1 75159
0 0 0 1 0 0 1 0 74013
0 0 0 1 0 0 1 0 0 67753
0 0 0 1 0 0 1 0 0 0 decorrelation
0 0 0 1 0 0 1 0 0 1 speckle
0 0 0 1 0 0 1 0 1 71811
0 0 0 1 0 0 1 0 1 0 depth
0 0 0 1 0 0 1 0 1 1 69813
0 0 0 1 0 0 1 0 1 1 0 blur
0 0 0 1 0 0 1 0 1 1 1 62798
0 0 0 1 0 0 1 0 1 1 1 0 brightness
0 0 0 1 0 0 1 0 1 1 1 1 visibility
0 0 0 1 0 0 1 1 74906
0 0 0 1 0 0 1 1 0 71376
0 0 0 1 0 0 1 1 0 0 dispersion
0 0 0 1 0 0 1 1 0 1 assimilation
0 0 0 1 0 0 1 1 1 71903
0 0 0 1 0 0 1 1 1 0 64482
0 0 0 1 0 0 1 1 1 0 0 55680
0 0 0 1 0 0 1 1 1 0 0 0 deformation
0 0 0 1 0 0 1 1 1 0 0 1 53381
0 0 0 1 0 0 1 1 1 0 0 1 0 compression
0 0 0 1 0 0 1 1 1 0 0 1 1 distortion
0 0 0 1 0 0 1 1 1 0 1 62665
0 0 0 1 0 0 1 1 1 0 1 0 shrinkage
0 0 0 1 0 0 1 1 1 0 1 1 collapse
0 0 0 1 0 0 1 1 1 1 68732
0 0 0 1 0 0 1 1 1 1 0 inhomogeneity
0 0 0 1 0 0 1 1 1 1 1 63074
0 0 0 1 0 0 1 1 1 1 1 0 drift
0 0 0 1 0 0 1 1 1 1 1 1 misalignment
0 0 0 1 0 1 75895
0 0 0 1 0 1 0 75559
0 0 0 1 0 1 0 0 74812
0 0 0 1 0 1 0 0 0 73371
0 0 0 1 0 1 0 0 0 0 69420
0 0 0 1 0 1 0 0 0 0 0 61302
0 0 0 1 0 1 0 0 0 0 0 0 48478
0 0 0 1 0 1 0 0 0 0 0 0 0 adhesion
0 0 0 1 0 1 0 0 0 0 0 0 1 attachment
0 0 0 1 0 1 0 0 0 0 0 1 54717
0 0 0 1 0 1 0 0 0 0 0 1 0 cell spreading
0 0 0 1 0 1 0 0 0 0 0 1 1 cell attachment
0 0 0 1 0 1 0 0 0 0 1 65913
0 0 0 1 0 1 0 0 0 0 1 0 61050
0 0 0 1 0 1 0 0 0 0 1 0 0 cellular adhesion
0 0 0 1 0 1 0 0 0 0 1 0 1 52120
0 0 0 1 0 1 0 0 0 0 1 0 1 0 cell-cell adhesion
0 0 0 1 0 1 0 0 0 0 1 0 1 1 cell&#x2013;cell adhesion
0 0 0 1 0 1 0 0 0 0 1 1 63381
0 0 0 1 0 1 0 0 0 0 1 1 0 cell-cell contact
0 0 0 1 0 1 0 0 0 0 1 1 1 50482
0 0 0 1 0 1 0 0 0 0 1 1 1 0 cell-cell interaction
0 0 0 1 0 1 0 0 0 0 1 1 1 1 cell-cell interactions
0 0 0 1 0 1 0 0 0 1 72075
0 0 0 1 0 1 0 0 0 1 0 64827
0 0 0 1 0 1 0 0 0 1 0 0 cell elongation
0 0 0 1 0 1 0 0 0 1 0 1 48412
0 0 0 1 0 1 0 0 0 1 0 1 0 shape
0 0 0 1 0 1 0 0 0 1 0 1 1 cell shape
0 0 0 1 0 1 0 0 0 1 1 65103
0 0 0 1 0 1 0 0 0 1 1 0 53035
0 0 0 1 0 1 0 0 0 1 1 0 0 topography
0 0 0 1 0 1 0 0 0 1 1 0 1 surface topography
0 0 0 1 0 1 0 0 0 1 1 1 61932
0 0 0 1 0 1 0 0 0 1 1 1 0 cell patterning
0 0 0 1 0 1 0 0 0 1 1 1 1 59825
0 0 0 1 0 1 0 0 0 1 1 1 1 0 cell-material interaction
0 0 0 1 0 1 0 0 0 1 1 1 1 1 52899
0 0 0 1 0 1 0 0 0 1 1 1 1 1 0 41298
0 0 0 1 0 1 0 0 0 1 1 1 1 1 0 0 micropatterning
0 0 0 1 0 1 0 0 0 1 1 1 1 1 0 1 micropattern
0 0 0 1 0 1 0 0 0 1 1 1 1 1 1 44373
0 0 0 1 0 1 0 0 0 1 1 1 1 1 1 0 nanotopography
0 0 0 1 0 1 0 0 0 1 1 1 1 1 1 1 microtopography
0 0 0 1 0 1 0 0 1 74062
0 0 0 1 0 1 0 0 1 0 70380
0 0 0 1 0 1 0 0 1 0 0 cell guidance
0 0 0 1 0 1 0 0 1 0 1 chemotropism
0 0 0 1 0 1 0 0 1 1 73556
0 0 0 1 0 1 0 0 1 1 0 56294
0 0 0 1 0 1 0 0 1 1 0 0 concentration gradient
0 0 0 1 0 1 0 0 1 1 0 1 38453
0 0 0 1 0 1 0 0 1 1 0 1 0 gradient
0 0 0 1 0 1 0 0 1 1 0 1 1 gradients
0 0 0 1 0 1 0 0 1 1 1 72714
0 0 0 1 0 1 0 0 1 1 1 0 70018
0 0 0 1 0 1 0 0 1 1 1 0 0 52090
0 0 0 1 0 1 0 0 1 1 1 0 0 0 repulsion
0 0 0 1 0 1 0 0 1 1 1 0 0 1 attraction
0 0 0 1 0 1 0 0 1 1 1 0 1 56823
0 0 0 1 0 1 0 0 1 1 1 0 1 0 50674
0 0 0 1 0 1 0 0 1 1 1 0 1 0 0 chemoattractant
0 0 0 1 0 1 0 0 1 1 1 0 1 0 1 45317
0 0 0 1 0 1 0 0 1 1 1 0 1 0 1 0 chemotaxis
0 0 0 1 0 1 0 0 1 1 1 0 1 0 1 1 chemokinesis
0 0 0 1 0 1 0 0 1 1 1 0 1 1 54539
0 0 0 1 0 1 0 0 1 1 1 0 1 1 0 chemoattraction
0 0 0 1 0 1 0 0 1 1 1 0 1 1 1 chemorepulsion
0 0 0 1 0 1 0 0 1 1 1 1 70400
0 0 0 1 0 1 0 0 1 1 1 1 0 61181
0 0 0 1 0 1 0 0 1 1 1 1 0 0 directional cell migration
0 0 0 1 0 1 0 0 1 1 1 1 0 1 58919
0 0 0 1 0 1 0 0 1 1 1 1 0 1 0 cell movement
0 0 0 1 0 1 0 0 1 1 1 1 0 1 1 46341
0 0 0 1 0 1 0 0 1 1 1 1 0 1 1 0 collective migration
0 0 0 1 0 1 0 0 1 1 1 1 0 1 1 1 42796
0 0 0 1 0 1 0 0 1 1 1 1 0 1 1 1 0 collective cell migration
0 0 0 1 0 1 0 0 1 1 1 1 0 1 1 1 1 contact inhibition of locomotion
0 0 0 1 0 1 0 0 1 1 1 1 1 68120
0 0 0 1 0 1 0 0 1 1 1 1 1 0 44591
0 0 0 1 0 1 0 0 1 1 1 1 1 0 0 electrotaxis
0 0 0 1 0 1 0 0 1 1 1 1 1 0 1 galvanotaxis
0 0 0 1 0 1 0 0 1 1 1 1 1 1 63046
0 0 0 1 0 1 0 0 1 1 1 1 1 1 0 traction force
0 0 0 1 0 1 0 0 1 1 1 1 1 1 1 51751
0 0 0 1 0 1 0 0 1 1 1 1 1 1 1 0 haptotaxis
0 0 0 1 0 1 0 0 1 1 1 1 1 1 1 1 51185
0 0 0 1 0 1 0 0 1 1 1 1 1 1 1 1 0 contact guidance
0 0 0 1 0 1 0 0 1 1 1 1 1 1 1 1 1 durotaxis
0 0 0 1 0 1 0 1 74999
0 0 0 1 0 1 0 1 0 70437
0 0 0 1 0 1 0 1 0 0 66138
0 0 0 1 0 1 0 1 0 0 0 mechanosensitive ion channels
0 0 0 1 0 1 0 1 0 0 1 62740
0 0 0 1 0 1 0 1 0 0 1 0 47712
0 0 0 1 0 1 0 1 0 0 1 0 0 mechanosensation
0 0 0 1 0 1 0 1 0 0 1 0 1 mechanosensory
0 0 0 1 0 1 0 1 0 0 1 1 56305
0 0 0 1 0 1 0 1 0 0 1 1 0 mechanosensitive
0 0 0 1 0 1 0 1 0 0 1 1 1 46172
0 0 0 1 0 1 0 1 0 0 1 1 1 0 mechanotransduction
0 0 0 1 0 1 0 1 0 0 1 1 1 1 mechanosensing
0 0 0 1 0 1 0 1 0 1 66267
0 0 0 1 0 1 0 1 0 1 0 mechanosensitivity
0 0 0 1 0 1 0 1 0 1 1 57577
0 0 0 1 0 1 0 1 0 1 1 0 piezo2
0 0 0 1 0 1 0 1 0 1 1 1 piezo1
0 0 0 1 0 1 0 1 1 74102
0 0 0 1 0 1 0 1 1 0 73048
0 0 0 1 0 1 0 1 1 0 0 56754
0 0 0 1 0 1 0 1 1 0 0 0 roughness
0 0 0 1 0 1 0 1 1 0 0 1 surface roughness
0 0 0 1 0 1 0 1 1 0 1 71330
0 0 0 1 0 1 0 1 1 0 1 0 67955
0 0 0 1 0 1 0 1 1 0 1 0 0 58518
0 0 0 1 0 1 0 1 1 0 1 0 0 0 conductivity
0 0 0 1 0 1 0 1 1 0 1 0 0 1 hydraulic conductivity
0 0 0 1 0 1 0 1 1 0 1 0 1 62974
0 0 0 1 0 1 0 1 1 0 1 0 1 0 viscosity
0 0 0 1 0 1 0 1 1 0 1 0 1 1 surface tension
0 0 0 1 0 1 0 1 1 0 1 1 69531
0 0 0 1 0 1 0 1 1 0 1 1 0 brain stiffness
0 0 0 1 0 1 0 1 1 0 1 1 1 68112
0 0 0 1 0 1 0 1 1 0 1 1 1 0 63963
0 0 0 1 0 1 0 1 1 0 1 1 1 0 0 47946
0 0 0 1 0 1 0 1 1 0 1 1 1 0 0 0 substrate stiffness
0 0 0 1 0 1 0 1 1 0 1 1 1 0 0 1 matrix stiffness
0 0 0 1 0 1 0 1 1 0 1 1 1 0 1 51529
0 0 0 1 0 1 0 1 1 0 1 1 1 0 1 0 tissue mechanics
0 0 0 1 0 1 0 1 1 0 1 1 1 0 1 1 tissue stiffness
0 0 0 1 0 1 0 1 1 0 1 1 1 1 66993
0 0 0 1 0 1 0 1 1 0 1 1 1 1 0 52766
0 0 0 1 0 1 0 1 1 0 1 1 1 1 0 0 rigidity
0 0 0 1 0 1 0 1 1 0 1 1 1 1 0 1 40285
0 0 0 1 0 1 0 1 1 0 1 1 1 1 0 1 0 stiffness
0 0 0 1 0 1 0 1 1 0 1 1 1 1 0 1 1 elasticity
0 0 0 1 0 1 0 1 1 0 1 1 1 1 1 64871
0 0 0 1 0 1 0 1 1 0 1 1 1 1 1 0 59691
0 0 0 1 0 1 0 1 1 0 1 1 1 1 1 0 0 material properties
0 0 0 1 0 1 0 1 1 0 1 1 1 1 1 0 1 54756
0 0 0 1 0 1 0 1 1 0 1 1 1 1 1 0 1 0 43354
0 0 0 1 0 1 0 1 1 0 1 1 1 1 1 0 1 0 0 viscoelasticity
0 0 0 1 0 1 0 1 1 0 1 1 1 1 1 0 1 0 1 viscoelastic
0 0 0 1 0 1 0 1 1 0 1 1 1 1 1 0 1 1 50496
0 0 0 1 0 1 0 1 1 0 1 1 1 1 1 0 1 1 0 rheology
0 0 0 1 0 1 0 1 1 0 1 1 1 1 1 0 1 1 1 poroelasticity
0 0 0 1 0 1 0 1 1 0 1 1 1 1 1 1 60200
0 0 0 1 0 1 0 1 1 0 1 1 1 1 1 1 0 strain rate
0 0 0 1 0 1 0 1 1 0 1 1 1 1 1 1 1 46759
0 0 0 1 0 1 0 1 1 0 1 1 1 1 1 1 1 0 young&#x2019;s modulus
0 0 0 1 0 1 0 1 1 0 1 1 1 1 1 1 1 1 44167
0 0 0 1 0 1 0 1 1 0 1 1 1 1 1 1 1 1 0 elastic modulus
0 0 0 1 0 1 0 1 1 0 1 1 1 1 1 1 1 1 1 young's modulus
0 0 0 1 0 1 0 1 1 1 73301
0 0 0 1 0 1 0 1 1 1 0 65880
0 0 0 1 0 1 0 1 1 1 0 0 wall shear stress
0 0 0 1 0 1 0 1 1 1 0 1 54083
0 0 0 1 0 1 0 1 1 1 0 1 0 shear stress
0 0 0 1 0 1 0 1 1 1 0 1 1 fluid shear stress
0 0 0 1 0 1 0 1 1 1 1 72576
0 0 0 1 0 1 0 1 1 1 1 0 69128
0 0 0 1 0 1 0 1 1 1 1 0 0 59217
0 0 0 1 0 1 0 1 1 1 1 0 0 0 52618
0 0 0 1 0 1 0 1 1 1 1 0 0 0 0 mechanical loading
0 0 0 1 0 1 0 1 1 1 1 0 0 0 1 mechanical strain
0 0 0 1 0 1 0 1 1 1 1 0 0 1 57248
0 0 0 1 0 1 0 1 1 1 1 0 0 1 0 mechanical stretch
0 0 0 1 0 1 0 1 1 1 1 0 0 1 1 47081
0 0 0 1 0 1 0 1 1 1 1 0 0 1 1 0 mechanical stress
0 0 0 1 0 1 0 1 1 1 1 0 0 1 1 1 44792
0 0 0 1 0 1 0 1 1 1 1 0 0 1 1 1 0 mechanical
0 0 0 1 0 1 0 1 1 1 1 0 0 1 1 1 1 41046
0 0 0 1 0 1 0 1 1 1 1 0 0 1 1 1 1 0 mechanical force
0 0 0 1 0 1 0 1 1 1 1 0 0 1 1 1 1 1 mechanical forces
0 0 0 1 0 1 0 1 1 1 1 0 1 63759
0 0 0 1 0 1 0 1 1 1 1 0 1 0 vibration
0 0 0 1 0 1 0 1 1 1 1 0 1 1 41849
0 0 0 1 0 1 0 1 1 1 1 0 1 1 0 stretch
0 0 0 1 0 1 0 1 1 1 1 0 1 1 1 stretching
0 0 0 1 0 1 0 1 1 1 1 1 70138
0 0 0 1 0 1 0 1 1 1 1 1 0 traction
0 0 0 1 0 1 0 1 1 1 1 1 1 66588
0 0 0 1 0 1 0 1 1 1 1 1 1 0 gravity
0 0 0 1 0 1 0 1 1 1 1 1 1 1 54499
0 0 0 1 0 1 0 1 1 1 1 1 1 1 0 forces
0 0 0 1 0 1 0 1 1 1 1 1 1 1 1 friction
0 0 0 1 0 1 1 75836
0 0 0 1 0 1 1 0 75744
0 0 0 1 0 1 1 0 0 74604
0 0 0 1 0 1 1 0 0 0 67871
0 0 0 1 0 1 1 0 0 0 0 shell
0 0 0 1 0 1 1 0 0 0 1 biomineralization
0 0 0 1 0 1 1 0 0 1 70293
0 0 0 1 0 1 1 0 0 1 0 percolation
0 0 0 1 0 1 1 0 0 1 1 axoplasm
0 0 0 1 0 1 1 0 1 75410
0 0 0 1 0 1 1 0 1 0 67163
0 0 0 1 0 1 1 0 1 0 0 39845
0 0 0 1 0 1 1 0 1 0 0 0 compartment
0 0 0 1 0 1 1 0 1 0 0 1 compartments
0 0 0 1 0 1 1 0 1 0 1 58348
0 0 0 1 0 1 1 0 1 0 1 0 compartmentalization
0 0 0 1 0 1 1 0 1 0 1 1 compartmentation
0 0 0 1 0 1 1 0 1 1 74464
0 0 0 1 0 1 1 0 1 1 0 tortuosity
0 0 0 1 0 1 1 0 1 1 1 72959
0 0 0 1 0 1 1 0 1 1 1 0 67146
0 0 0 1 0 1 1 0 1 1 1 0 0 water exchange
0 0 0 1 0 1 1 0 1 1 1 0 1 exchange rate
0 0 0 1 0 1 1 0 1 1 1 1 71329
0 0 0 1 0 1 1 0 1 1 1 1 0 residence time
0 0 0 1 0 1 1 0 1 1 1 1 1 69735
0 0 0 1 0 1 1 0 1 1 1 1 1 0 confinement
0 0 0 1 0 1 1 0 1 1 1 1 1 1 68968
0 0 0 1 0 1 1 0 1 1 1 1 1 1 0 diffusion barrier
0 0 0 1 0 1 1 0 1 1 1 1 1 1 1 66096
0 0 0 1 0 1 1 0 1 1 1 1 1 1 1 0 51059
0 0 0 1 0 1 1 0 1 1 1 1 1 1 1 0 0 lateral diffusion
0 0 0 1 0 1 1 0 1 1 1 1 1 1 1 0 1 receptor mobility
0 0 0 1 0 1 1 0 1 1 1 1 1 1 1 1 53132
0 0 0 1 0 1 1 0 1 1 1 1 1 1 1 1 0 anomalous diffusion
0 0 0 1 0 1 1 0 1 1 1 1 1 1 1 1 1 46925
0 0 0 1 0 1 1 0 1 1 1 1 1 1 1 1 1 0 diffusion time
0 0 0 1 0 1 1 0 1 1 1 1 1 1 1 1 1 1 39805
0 0 0 1 0 1 1 0 1 1 1 1 1 1 1 1 1 1 0 diffusion
0 0 0 1 0 1 1 0 1 1 1 1 1 1 1 1 1 1 1 diffusion coefficient
0 0 0 1 0 1 1 1 75816
0 0 0 1 0 1 1 1 0 75177
0 0 0 1 0 1 1 1 0 0 74074
0 0 0 1 0 1 1 1 0 0 0 68795
0 0 0 1 0 1 1 1 0 0 0 0 remote
0 0 0 1 0 1 1 1 0 0 0 1 61161
0 0 0 1 0 1 1 1 0 0 0 1 0 access
0 0 0 1 0 1 1 1 0 0 0 1 1 accessibility
0 0 0 1 0 1 1 1 0 0 1 73040
0 0 0 1 0 1 1 1 0 0 1 0 40666
0 0 0 1 0 1 1 1 0 0 1 0 0 reservoirs
0 0 0 1 0 1 1 1 0 0 1 0 1 reservoir
0 0 0 1 0 1 1 1 0 0 1 1 69591
0 0 0 1 0 1 1 1 0 0 1 1 0 59914
0 0 0 1 0 1 1 1 0 0 1 1 0 0 physical
0 0 0 1 0 1 1 1 0 0 1 1 0 1 38946
0 0 0 1 0 1 1 1 0 0 1 1 0 1 0 barriers
0 0 0 1 0 1 1 1 0 0 1 1 0 1 1 barrier
0 0 0 1 0 1 1 1 0 0 1 1 1 61723
0 0 0 1 0 1 1 1 0 0 1 1 1 0 biological barriers
0 0 0 1 0 1 1 1 0 0 1 1 1 1 45382
0 0 0 1 0 1 1 1 0 0 1 1 1 1 0 penetration
0 0 0 1 0 1 1 1 0 0 1 1 1 1 1 penetrating
0 0 0 1 0 1 1 1 0 1 74358
0 0 0 1 0 1 1 1 0 1 0 63277
0 0 0 1 0 1 1 1 0 1 0 0 vestibule
0 0 0 1 0 1 1 1 0 1 0 1 cleft
0 0 0 1 0 1 1 1 0 1 1 71301
0 0 0 1 0 1 1 1 0 1 1 0 contact
0 0 0 1 0 1 1 1 0 1 1 1 66627
0 0 0 1 0 1 1 1 0 1 1 1 0 interface
0 0 0 1 0 1 1 1 0 1 1 1 1 layer
0 0 0 1 0 1 1 1 1 75330
0 0 0 1 0 1 1 1 1 0 71283
0 0 0 1 0 1 1 1 1 0 0 propeller
0 0 0 1 0 1 1 1 1 0 1 torsion
0 0 0 1 0 1 1 1 1 1 74786
0 0 0 1 0 1 1 1 1 1 0 68747
0 0 0 1 0 1 1 1 1 1 0 0 54633
0 0 0 1 0 1 1 1 1 1 0 0 0 orientation
0 0 0 1 0 1 1 1 1 1 0 0 1 48650
0 0 0 1 0 1 1 1 1 1 0 0 1 0 position
0 0 0 1 0 1 1 1 1 1 0 0 1 1 positioning
0 0 0 1 0 1 1 1 1 1 0 1 64741
0 0 0 1 0 1 1 1 1 1 0 1 0 configuration
0 0 0 1 0 1 1 1 1 1 0 1 1 55192
0 0 0 1 0 1 1 1 1 1 0 1 1 0 geometry
0 0 0 1 0 1 1 1 1 1 0 1 1 1 spacing
0 0 0 1 0 1 1 1 1 1 1 71343
0 0 0 1 0 1 1 1 1 1 1 0 tether
0 0 0 1 0 1 1 1 1 1 1 1 62207
0 0 0 1 0 1 1 1 1 1 1 1 0 scaffolding
0 0 0 1 0 1 1 1 1 1 1 1 1 anchoring
0 0 0 1 1 75937
0 0 0 1 1 0 75827
0 0 0 1 1 0 0 75242
0 0 0 1 1 0 0 0 64260
0 0 0 1 1 0 0 0 0 45437
0 0 0 1 1 0 0 0 0 0 scratching
0 0 0 1 1 0 0 0 0 1 scratch
0 0 0 1 1 0 0 0 1 49984
0 0 0 1 1 0 0 0 1 0 wounding
0 0 0 1 1 0 0 0 1 1 41572
0 0 0 1 1 0 0 0 1 1 0 wound
0 0 0 1 1 0 0 0 1 1 1 wounds
0 0 0 1 1 0 0 1 73951
0 0 0 1 1 0 0 1 0 69649
0 0 0 1 1 0 0 1 0 0 filament
0 0 0 1 1 0 0 1 0 1 61994
0 0 0 1 1 0 0 1 0 1 0 hargreaves
0 0 0 1 1 0 0 1 0 1 1 38644
0 0 0 1 1 0 0 1 0 1 1 0 von frey
0 0 0 1 1 0 0 1 0 1 1 1 von frey filaments
0 0 0 1 1 0 0 1 1 70920
0 0 0 1 1 0 0 1 1 0 pinch
0 0 0 1 1 0 0 1 1 1 pin
0 0 0 1 1 0 1 75687
0 0 0 1 1 0 1 0 71784
0 0 0 1 1 0 1 0 0 hive
0 0 0 1 1 0 1 0 1 51987
0 0 0 1 1 0 1 0 1 0 nest
0 0 0 1 1 0 1 0 1 1 nesting
0 0 0 1 1 0 1 1 74992
0 0 0 1 1 0 1 1 0 73875
0 0 0 1 1 0 1 1 0 0 67837
0 0 0 1 1 0 1 1 0 0 0 38883
0 0 0 1 1 0 1 1 0 0 0 0 arm
0 0 0 1 1 0 1 1 0 0 0 1 arms
0 0 0 1 1 0 1 1 0 0 1 63684
0 0 0 1 1 0 1 1 0 0 1 0 runway
0 0 0 1 1 0 1 1 0 0 1 1 49785
0 0 0 1 1 0 1 1 0 0 1 1 0 maze
0 0 0 1 1 0 1 1 0 0 1 1 1 45920
0 0 0 1 1 0 1 1 0 0 1 1 1 0 plus maze
0 0 0 1 1 0 1 1 0 0 1 1 1 1 plus-maze
0 0 0 1 1 0 1 1 0 1 68680
0 0 0 1 1 0 1 1 0 1 0 lid
0 0 0 1 1 0 1 1 0 1 1 63977
0 0 0 1 1 0 1 1 0 1 1 0 blackout
0 0 0 1 1 0 1 1 0 1 1 1 hanging
0 0 0 1 1 0 1 1 1 73949
0 0 0 1 1 0 1 1 1 0 71271
0 0 0 1 1 0 1 1 1 0 0 66650
0 0 0 1 1 0 1 1 1 0 0 0 47978
0 0 0 1 1 0 1 1 1 0 0 0 0 swimming
0 0 0 1 1 0 1 1 1 0 0 0 1 swimming behavior
0 0 0 1 1 0 1 1 1 0 0 1 56011
0 0 0 1 1 0 1 1 1 0 0 1 0 thigmotaxis
0 0 0 1 1 0 1 1 1 0 0 1 1 shoaling
0 0 0 1 1 0 1 1 1 0 1 69195
0 0 0 1 1 0 1 1 1 0 1 0 circling
0 0 0 1 1 0 1 1 1 0 1 1 59791
0 0 0 1 1 0 1 1 1 0 1 1 0 agility
0 0 0 1 1 0 1 1 1 0 1 1 1 55424
0 0 0 1 1 0 1 1 1 0 1 1 1 0 climbing
0 0 0 1 1 0 1 1 1 0 1 1 1 1 jumping
0 0 0 1 1 0 1 1 1 1 73840
0 0 0 1 1 0 1 1 1 1 0 67854
0 0 0 1 1 0 1 1 1 1 0 0 dishabituation
0 0 0 1 1 0 1 1 1 1 0 1 58631
0 0 0 1 1 0 1 1 1 1 0 1 0 sniffing
0 0 0 1 1 0 1 1 1 1 0 1 1 licking
0 0 0 1 1 0 1 1 1 1 1 70104
0 0 0 1 1 0 1 1 1 1 1 0 58427
0 0 0 1 1 0 1 1 1 1 1 0 0 defensive burying
0 0 0 1 1 0 1 1 1 1 1 0 1 stress-induced hyperthermia
0 0 0 1 1 0 1 1 1 1 1 1 68276
0 0 0 1 1 0 1 1 1 1 1 1 0 56929
0 0 0 1 1 0 1 1 1 1 1 1 0 0 neophobia
0 0 0 1 1 0 1 1 1 1 1 1 0 1 novel environment
0 0 0 1 1 0 1 1 1 1 1 1 1 65233
0 0 0 1 1 0 1 1 1 1 1 1 1 0 rearing
0 0 0 1 1 0 1 1 1 1 1 1 1 1 exploratory activity
0 0 0 1 1 1 75841
0 0 0 1 1 1 0 75372
0 0 0 1 1 1 0 0 74067
0 0 0 1 1 1 0 0 0 61672
0 0 0 1 1 1 0 0 0 0 body posture
0 0 0 1 1 1 0 0 0 1 body movement
0 0 0 1 1 1 0 0 1 71634
0 0 0 1 1 1 0 0 1 0 61619
0 0 0 1 1 1 0 0 1 0 0 47381
0 0 0 1 1 1 0 0 1 0 0 0 posture
0 0 0 1 1 1 0 0 1 0 0 1 39240
0 0 0 1 1 1 0 0 1 0 0 1 0 standing
0 0 0 1 1 1 0 0 1 0 0 1 1 sitting
0 0 0 1 1 1 0 0 1 0 1 54571
0 0 0 1 1 1 0 0 1 0 1 0 bed
0 0 0 1 1 1 0 0 1 0 1 1 48993
0 0 0 1 1 1 0 0 1 0 1 1 0 lying
0 0 0 1 1 1 0 0 1 0 1 1 1 supine position
0 0 0 1 1 1 0 0 1 1 68853
0 0 0 1 1 1 0 0 1 1 0 individual alpha frequency
0 0 0 1 1 1 0 0 1 1 1 42476
0 0 0 1 1 1 0 0 1 1 1 0 eyes-open
0 0 0 1 1 1 0 0 1 1 1 1 38391
0 0 0 1 1 1 0 0 1 1 1 1 0 eyes closed
0 0 0 1 1 1 0 0 1 1 1 1 1 eyes open
0 0 0 1 1 1 0 1 75144
0 0 0 1 1 1 0 1 0 56417
0 0 0 1 1 1 0 1 0 0 passive
0 0 0 1 1 1 0 1 0 1 active
0 0 0 1 1 1 0 1 1 71694
0 0 0 1 1 1 0 1 1 0 47158
0 0 0 1 1 1 0 1 1 0 0 healthy
0 0 0 1 1 1 0 1 1 0 1 normal
0 0 0 1 1 1 0 1 1 1 68299
0 0 0 1 1 1 0 1 1 1 0 rest
0 0 0 1 1 1 0 1 1 1 1 49463
0 0 0 1 1 1 0 1 1 1 1 0 resting
0 0 0 1 1 1 0 1 1 1 1 1 basal
0 0 0 1 1 1 1 75584
0 0 0 1 1 1 1 0 74846
0 0 0 1 1 1 1 0 0 72361
0 0 0 1 1 1 1 0 0 0 57786
0 0 0 1 1 1 1 0 0 0 0 quiescence
0 0 0 1 1 1 1 0 0 0 1 dormancy
0 0 0 1 1 1 1 0 0 1 67441
0 0 0 1 1 1 1 0 0 1 0 56035
0 0 0 1 1 1 1 0 0 1 0 0 39074
0 0 0 1 1 1 1 0 0 1 0 0 0 transition
0 0 0 1 1 1 1 0 0 1 0 0 1 transitions
0 0 0 1 1 1 1 0 0 1 0 1 39668
0 0 0 1 1 1 1 0 0 1 0 1 0 switching
0 0 0 1 1 1 1 0 0 1 0 1 1 switch
0 0 0 1 1 1 1 0 0 1 1 63655
0 0 0 1 1 1 1 0 0 1 1 0 39173
0 0 0 1 1 1 1 0 0 1 1 0 0 attractor
0 0 0 1 1 1 1 0 0 1 1 0 1 attractors
0 0 0 1 1 1 1 0 0 1 1 1 39705
0 0 0 1 1 1 1 0 0 1 1 1 0 state
0 0 0 1 1 1 1 0 0 1 1 1 1 states
0 0 0 1 1 1 1 0 1 74046
0 0 0 1 1 1 1 0 1 0 57478
0 0 0 1 1 1 1 0 1 0 0 pausing
0 0 0 1 1 1 1 0 1 0 1 45016
0 0 0 1 1 1 1 0 1 0 1 0 pauses
0 0 0 1 1 1 1 0 1 0 1 1 pause
0 0 0 1 1 1 1 0 1 1 68122
0 0 0 1 1 1 1 0 1 1 0 reversal
0 0 0 1 1 1 1 0 1 1 1 reacquisition
0 0 0 1 1 1 1 1 75388
0 0 0 1 1 1 1 1 0 73001
0 0 0 1 1 1 1 1 0 0 mean shift
0 0 0 1 1 1 1 1 0 1 61120
0 0 0 1 1 1 1 1 0 1 0 trajectory
0 0 0 1 1 1 1 1 0 1 1 phase plane
0 0 0 1 1 1 1 1 1 74131
0 0 0 1 1 1 1 1 1 0 70648
0 0 0 1 1 1 1 1 1 0 0 crawling
0 0 0 1 1 1 1 1 1 0 1 62819
0 0 0 1 1 1 1 1 1 0 1 0 motility
0 0 0 1 1 1 1 1 1 0 1 1 57410
0 0 0 1 1 1 1 1 1 0 1 1 0 peristalsis
0 0 0 1 1 1 1 1 1 0 1 1 1 propulsion
0 0 0 1 1 1 1 1 1 1 71930
0 0 0 1 1 1 1 1 1 1 0 67810
0 0 0 1 1 1 1 1 1 1 0 0 50302
0 0 0 1 1 1 1 1 1 1 0 0 0 acceleration
0 0 0 1 1 1 1 1 1 1 0 0 1 deceleration
0 0 0 1 1 1 1 1 1 1 0 1 65044
0 0 0 1 1 1 1 1 1 1 0 1 0 56067
0 0 0 1 1 1 1 1 1 1 0 1 0 0 movement speed
0 0 0 1 1 1 1 1 1 1 0 1 0 1 41670
0 0 0 1 1 1 1 1 1 1 0 1 0 1 0 speed
0 0 0 1 1 1 1 1 1 1 0 1 0 1 1 velocity
0 0 0 1 1 1 1 1 1 1 0 1 1 61069
0 0 0 1 1 1 1 1 1 1 0 1 1 0 kinematic
0 0 0 1 1 1 1 1 1 1 0 1 1 1 angular velocity
0 0 0 1 1 1 1 1 1 1 1 69722
0 0 0 1 1 1 1 1 1 1 1 0 59879
0 0 0 1 1 1 1 1 1 1 1 0 0 41712
0 0 0 1 1 1 1 1 1 1 1 0 0 0 rotation
0 0 0 1 1 1 1 1 1 1 1 0 0 1 rotational
0 0 0 1 1 1 1 1 1 1 1 0 1 49534
0 0 0 1 1 1 1 1 1 1 1 0 1 0 movement
0 0 0 1 1 1 1 1 1 1 1 0 1 1 displacement
0 0 0 1 1 1 1 1 1 1 1 1 65406
0 0 0 1 1 1 1 1 1 1 1 1 0 turning
0 0 0 1 1 1 1 1 1 1 1 1 1 46384
0 0 0 1 1 1 1 1 1 1 1 1 1 0 direction
0 0 0 1 1 1 1 1 1 1 1 1 1 1 41103
0 0 0 1 1 1 1 1 1 1 1 1 1 1 0 directionality
0 0 0 1 1 1 1 1 1 1 1 1 1 1 1 directional
0 0 1 76060
0 0 1 0 75992
0 0 1 0 0 75712
0 0 1 0 0 0 72422
0 0 1 0 0 0 0 nis
0 0 1 0 0 0 1 acquired
0 0 1 0 0 1 75482
0 0 1 0 0 1 0 tdt
0 0 1 0 0 1 1 neurosensory
0 0 1 0 1 75911
0 0 1 0 1 0 73325
0 0 1 0 1 0 0 mip
0 0 1 0 1 0 1 lep
0 0 1 0 1 1 75461
0 0 1 0 1 1 0 mica
0 0 1 0 1 1 1 73702
0 0 1 0 1 1 1 0 trio
0 0 1 0 1 1 1 1 56185
0 0 1 0 1 1 1 1 0 sp8
0 0 1 0 1 1 1 1 1 tcs
0 0 1 1 76052
0 0 1 1 0 76021
0 0 1 1 0 0 75965
0 0 1 1 0 0 0 73500
0 0 1 1 0 0 0 0 ccn
0 0 1 1 0 0 0 1 39301
0 0 1 1 0 0 0 1 0 gap
0 0 1 1 0 0 0 1 1 gaps
0 0 1 1 0 0 1 75448
0 0 1 1 0 0 1 0 73669
0 0 1 1 0 0 1 0 0 cin
0 0 1 1 0 0 1 0 1 cct
0 0 1 1 0 0 1 1 74439
0 0 1 1 0 0 1 1 0 cfd
0 0 1 1 0 0 1 1 1 72249
0 0 1 1 0 0 1 1 1 0 bess
0 0 1 1 0 0 1 1 1 1 sac
0 0 1 1 0 1 76000
0 0 1 1 0 1 0 75833
0 0 1 1 0 1 0 0 75220
0 0 1 1 0 1 0 0 0 71897
0 0 1 1 0 1 0 0 0 0 gdi
0 0 1 1 0 1 0 0 0 1 nte
0 0 1 1 0 1 0 0 1 73550
0 0 1 1 0 1 0 0 1 0 cpe
0 0 1 1 0 1 0 0 1 1 nss
0 0 1 1 0 1 0 1 75745
0 0 1 1 0 1 0 1 0 74480
0 0 1 1 0 1 0 1 0 0 hri
0 0 1 1 0 1 0 1 0 1 pact
0 0 1 1 0 1 0 1 1 74995
0 0 1 1 0 1 0 1 1 0 udp
0 0 1 1 0 1 0 1 1 1 71425
0 0 1 1 0 1 0 1 1 1 0 tubby
0 0 1 1 0 1 0 1 1 1 1 rax
0 0 1 1 0 1 1 75946
0 0 1 1 0 1 1 0 75166
0 0 1 1 0 1 1 0 0 sdf
0 0 1 1 0 1 1 0 1 ghk
0 0 1 1 0 1 1 1 75715
0 0 1 1 0 1 1 1 0 74591
0 0 1 1 0 1 1 1 0 0 hse
0 0 1 1 0 1 1 1 0 1 72938
0 0 1 1 0 1 1 1 0 1 0 csi
0 0 1 1 0 1 1 1 0 1 1 ntcp
0 0 1 1 0 1 1 1 1 75322
0 0 1 1 0 1 1 1 1 0 ccs
0 0 1 1 0 1 1 1 1 1 tls
0 0 1 1 1 76047
0 0 1 1 1 0 76016
0 0 1 1 1 0 0 75941
0 0 1 1 1 0 0 0 75672
0 0 1 1 1 0 0 0 0 74136
0 0 1 1 1 0 0 0 0 0 pam
0 0 1 1 1 0 0 0 0 1 eet
0 0 1 1 1 0 0 0 1 75452
0 0 1 1 1 0 0 0 1 0 70541
0 0 1 1 1 0 0 0 1 0 0 dsi
0 0 1 1 1 0 0 0 1 0 1 dse
0 0 1 1 1 0 0 0 1 1 73295
0 0 1 1 1 0 0 0 1 1 0 cpa
0 0 1 1 1 0 0 0 1 1 1 sms
0 0 1 1 1 0 0 1 75783
0 0 1 1 1 0 0 1 0 70458
0 0 1 1 1 0 0 1 0 0 cas
0 0 1 1 1 0 0 1 0 1 tci
0 0 1 1 1 0 0 1 1 74576
0 0 1 1 1 0 0 1 1 0 rns
0 0 1 1 1 0 0 1 1 1 pas
0 0 1 1 1 0 1 76001
0 0 1 1 1 0 1 0 75908
0 0 1 1 1 0 1 0 0 75335
0 0 1 1 1 0 1 0 0 0 65601
0 0 1 1 1 0 1 0 0 0 0 eda
0 0 1 1 1 0 1 0 0 0 1 58707
0 0 1 1 1 0 1 0 0 0 1 0 gsr
0 0 1 1 1 0 1 0 0 0 1 1 scr
0 0 1 1 1 0 1 0 0 1 74318
0 0 1 1 1 0 1 0 0 1 0 opa
0 0 1 1 1 0 1 0 0 1 1 sap
0 0 1 1 1 0 1 0 1 75620
0 0 1 1 1 0 1 0 1 0 aura
0 0 1 1 1 0 1 0 1 1 74109
0 0 1 1 1 0 1 0 1 1 0 asc
0 0 1 1 1 0 1 0 1 1 1 caps
0 0 1 1 1 0 1 1 75975
0 0 1 1 1 0 1 1 0 75706
0 0 1 1 1 0 1 1 0 0 72304
0 0 1 1 1 0 1 1 0 0 0 pns
0 0 1 1 1 0 1 1 0 0 1 spn
0 0 1 1 1 0 1 1 0 1 75382
0 0 1 1 1 0 1 1 0 1 0 74721
0 0 1 1 1 0 1 1 0 1 0 0 72394
0 0 1 1 1 0 1 1 0 1 0 0 0 pe
0 0 1 1 1 0 1 1 0 1 0 0 1 ia
0 0 1 1 1 0 1 1 0 1 0 1 72861
0 0 1 1 1 0 1 1 0 1 0 1 0 mfn
0 0 1 1 1 0 1 1 0 1 0 1 1 es
0 0 1 1 1 0 1 1 0 1 1 74737
0 0 1 1 1 0 1 1 0 1 1 0 72496
0 0 1 1 1 0 1 1 0 1 1 0 0 66951
0 0 1 1 1 0 1 1 0 1 1 0 0 0 pb
0 0 1 1 1 0 1 1 0 1 1 0 0 1 mn
0 0 1 1 1 0 1 1 0 1 1 0 1 71006
0 0 1 1 1 0 1 1 0 1 1 0 1 0 gm
0 0 1 1 1 0 1 1 0 1 1 0 1 1 lc
0 0 1 1 1 0 1 1 0 1 1 1 73922
0 0 1 1 1 0 1 1 0 1 1 1 0 68688
0 0 1 1 1 0 1 1 0 1 1 1 0 0 sn
0 0 1 1 1 0 1 1 0 1 1 1 0 1 pv
0 0 1 1 1 0 1 1 0 1 1 1 1 71819
0 0 1 1 1 0 1 1 0 1 1 1 1 0 ai
0 0 1 1 1 0 1 1 0 1 1 1 1 1 pr
0 0 1 1 1 0 1 1 1 75889
0 0 1 1 1 0 1 1 1 0 75363
0 0 1 1 1 0 1 1 1 0 0 gem
0 0 1 1 1 0 1 1 1 0 1 bcm
0 0 1 1 1 0 1 1 1 1 75496
0 0 1 1 1 0 1 1 1 1 0 pic
0 0 1 1 1 0 1 1 1 1 1 74364
0 0 1 1 1 0 1 1 1 1 1 0 erna
0 0 1 1 1 0 1 1 1 1 1 1 pdc
0 0 1 1 1 1 76028
0 0 1 1 1 1 0 75944
0 0 1 1 1 1 0 0 75615
0 0 1 1 1 1 0 0 0 hyper
0 0 1 1 1 1 0 0 1 75453
0 0 1 1 1 1 0 0 1 0 ini
0 0 1 1 1 1 0 0 1 1 71710
0 0 1 1 1 1 0 0 1 1 0 flip
0 0 1 1 1 1 0 0 1 1 1 protamine
0 0 1 1 1 1 0 1 75832
0 0 1 1 1 1 0 1 0 74729
0 0 1 1 1 1 0 1 0 0 72309
0 0 1 1 1 1 0 1 0 0 0 apt
0 0 1 1 1 1 0 1 0 0 1 noe
0 0 1 1 1 1 0 1 0 1 73302
0 0 1 1 1 1 0 1 0 1 0 dnp
0 0 1 1 1 1 0 1 0 1 1 61801
0 0 1 1 1 1 0 1 0 1 1 0 epr
0 0 1 1 1 1 0 1 0 1 1 1 esr
0 0 1 1 1 1 0 1 1 75182
0 0 1 1 1 1 0 1 1 0 73777
0 0 1 1 1 1 0 1 1 0 0 gss
0 0 1 1 1 1 0 1 1 0 1 cho
0 0 1 1 1 1 0 1 1 1 74141
0 0 1 1 1 1 0 1 1 1 0 mas
0 0 1 1 1 1 0 1 1 1 1 mct
0 0 1 1 1 1 1 76011
0 0 1 1 1 1 1 0 75874
0 0 1 1 1 1 1 0 0 74377
0 0 1 1 1 1 1 0 0 0 hem
0 0 1 1 1 1 1 0 0 1 73757
0 0 1 1 1 1 1 0 0 1 0 msp
0 0 1 1 1 1 1 0 0 1 1 rgm
0 0 1 1 1 1 1 0 1 75014
0 0 1 1 1 1 1 0 1 0 67180
0 0 1 1 1 1 1 0 1 0 0 hemopexin
0 0 1 1 1 1 1 0 1 0 1 hmg
0 0 1 1 1 1 1 0 1 1 73279
0 0 1 1 1 1 1 0 1 1 0 filamin c
0 0 1 1 1 1 1 0 1 1 1 67855
0 0 1 1 1 1 1 0 1 1 1 0 mbd
0 0 1 1 1 1 1 0 1 1 1 1 mbd2
0 0 1 1 1 1 1 1 75968
0 0 1 1 1 1 1 1 0 75253
0 0 1 1 1 1 1 1 0 0 72145
0 0 1 1 1 1 1 1 0 0 0 fet
0 0 1 1 1 1 1 1 0 0 1 msi
0 0 1 1 1 1 1 1 0 1 74115
0 0 1 1 1 1 1 1 0 1 0 dnr
0 0 1 1 1 1 1 1 0 1 1 71445
0 0 1 1 1 1 1 1 0 1 1 0 mrp
0 0 1 1 1 1 1 1 0 1 1 1 nlr
0 0 1 1 1 1 1 1 1 75278
0 0 1 1 1 1 1 1 1 0 65245
0 0 1 1 1 1 1 1 1 0 0 proton leak
0 0 1 1 1 1 1 1 1 0 1 seahorse
0 0 1 1 1 1 1 1 1 1 69161
0 0 1 1 1 1 1 1 1 1 0 ribosome profiling
0 0 1 1 1 1 1 1 1 1 1 hts
0 1 76071
0 1 0 76068
0 1 0 0 76057
0 1 0 0 0 75995
0 1 0 0 0 0 75898
0 1 0 0 0 0 0 75165
0 1 0 0 0 0 0 0 71846
0 1 0 0 0 0 0 0 0 visual guidance
0 1 0 0 0 0 0 0 1 interception
0 1 0 0 0 0 0 1 73339
0 1 0 0 0 0 0 1 0 safety margin
0 1 0 0 0 0 0 1 1 40702
0 1 0 0 0 0 0 1 1 0 falls
0 1 0 0 0 0 0 1 1 1 39325
0 1 0 0 0 0 0 1 1 1 0 fall
0 1 0 0 0 0 0 1 1 1 1 falling
0 1 0 0 0 0 1 75499
0 1 0 0 0 0 1 0 71160
0 1 0 0 0 0 1 0 0 confusion
0 1 0 0 0 0 1 0 1 odd
0 1 0 0 0 0 1 1 75353
0 1 0 0 0 0 1 1 0 dfa
0 1 0 0 0 0 1 1 1 69018
0 1 0 0 0 0 1 1 1 0 bad
0 1 0 0 0 0 1 1 1 1 outlier
0 1 0 0 0 1 75955
0 1 0 0 0 1 0 75739
0 1 0 0 0 1 0 0 74387
0 1 0 0 0 1 0 0 0 66180
0 1 0 0 0 1 0 0 0 0 41053
0 1 0 0 0 1 0 0 0 0 0 signal
0 1 0 0 0 1 0 0 0 0 1 signals
0 1 0 0 0 1 0 0 0 1 47237
0 1 0 0 0 1 0 0 0 1 0 intensity
0 1 0 0 0 1 0 0 0 1 1 signal intensity
0 1 0 0 0 1 0 0 1 71494
0 1 0 0 0 1 0 0 1 0 57660
0 1 0 0 0 1 0 0 1 0 0 dynamic range
0 1 0 0 0 1 0 0 1 0 1 41677
0 1 0 0 0 1 0 0 1 0 1 0 signal to noise ratio
0 1 0 0 0 1 0 0 1 0 1 1 signal-to-noise
0 1 0 0 0 1 0 0 1 1 68791
0 1 0 0 0 1 0 0 1 1 0 capture
0 1 0 0 0 1 0 0 1 1 1 56201
0 1 0 0 0 1 0 0 1 1 1 0 detection
0 1 0 0 0 1 0 0 1 1 1 1 signal detection
0 1 0 0 0 1 0 1 74868
0 1 0 0 0 1 0 1 0 65292
0 1 0 0 0 1 0 1 0 0 exclusion
0 1 0 0 0 1 0 1 0 1 47004
0 1 0 0 0 1 0 1 0 1 0 met
0 1 0 0 0 1 0 1 0 1 1 criteria
0 1 0 0 0 1 0 1 1 72015
0 1 0 0 0 1 0 1 1 0 60572
0 1 0 0 0 1 0 1 1 0 0 cut-off
0 1 0 0 0 1 0 1 1 0 1 49578
0 1 0 0 0 1 0 1 1 0 1 0 threshold
0 1 0 0 0 1 0 1 1 0 1 1 detection threshold
0 1 0 0 0 1 0 1 1 1 64943
0 1 0 0 0 1 0 1 1 1 0 set
0 1 0 0 0 1 0 1 1 1 1 default
0 1 0 0 0 1 1 75814
0 1 0 0 0 1 1 0 75106
0 1 0 0 0 1 1 0 0 73804
0 1 0 0 0 1 1 0 0 0 pica
0 1 0 0 0 1 1 0 0 1 66991
0 1 0 0 0 1 1 0 0 1 0 independent components analysis
0 1 0 0 0 1 1 0 0 1 1 dual regression
0 1 0 0 0 1 1 0 1 73991
0 1 0 0 0 1 1 0 1 0 70227
0 1 0 0 0 1 1 0 1 0 0 58334
0 1 0 0 0 1 1 0 1 0 0 0 continuous eeg
0 1 0 0 0 1 1 0 1 0 0 1 55081
0 1 0 0 0 1 1 0 1 0 0 1 0 eeglab
0 1 0 0 0 1 1 0 1 0 0 1 1 average reference
0 1 0 0 0 1 1 0 1 0 1 66418
0 1 0 0 0 1 1 0 1 0 1 0 49510
0 1 0 0 0 1 1 0 1 0 1 0 0 eog
0 1 0 0 0 1 1 0 1 0 1 0 1 electrooculography
0 1 0 0 0 1 1 0 1 0 1 1 64144
0 1 0 0 0 1 1 0 1 0 1 1 0 46326
0 1 0 0 0 1 1 0 1 0 1 1 0 0 eye movement
0 1 0 0 0 1 1 0 1 0 1 1 0 1 eye-movements
0 1 0 0 0 1 1 0 1 0 1 1 1 58799
0 1 0 0 0 1 1 0 1 0 1 1 1 0 47202
0 1 0 0 0 1 1 0 1 0 1 1 1 0 0 blinking
0 1 0 0 0 1 1 0 1 0 1 1 1 0 1 blink
0 1 0 0 0 1 1 0 1 0 1 1 1 1 47403
0 1 0 0 0 1 1 0 1 0 1 1 1 1 0 eye blink
0 1 0 0 0 1 1 0 1 0 1 1 1 1 1 eye blinks
0 1 0 0 0 1 1 0 1 1 71916
0 1 0 0 0 1 1 0 1 1 0 66834
0 1 0 0 0 1 1 0 1 1 0 0 55521
0 1 0 0 0 1 1 0 1 1 0 0 0 38383
0 1 0 0 0 1 1 0 1 1 0 0 0 0 artefact
0 1 0 0 0 1 1 0 1 1 0 0 0 1 38306
0 1 0 0 0 1 1 0 1 1 0 0 0 1 0 artifact
0 1 0 0 0 1 1 0 1 1 0 0 0 1 1 38059
0 1 0 0 0 1 1 0 1 1 0 0 0 1 1 0 artifacts
0 1 0 0 0 1 1 0 1 1 0 0 0 1 1 1 artefacts
0 1 0 0 0 1 1 0 1 1 0 0 1 39694
0 1 0 0 0 1 1 0 1 1 0 0 1 0 motion artifacts
0 1 0 0 0 1 1 0 1 1 0 0 1 1 motion artifact
0 1 0 0 0 1 1 0 1 1 0 1 61334
0 1 0 0 0 1 1 0 1 1 0 1 0 ballistocardiogram
0 1 0 0 0 1 1 0 1 1 0 1 1 42208
0 1 0 0 0 1 1 0 1 1 0 1 1 0 artifact correction
0 1 0 0 0 1 1 0 1 1 0 1 1 1 artifact reduction
0 1 0 0 0 1 1 0 1 1 1 68911
0 1 0 0 0 1 1 0 1 1 1 0 46777
0 1 0 0 0 1 1 0 1 1 1 0 0 global signal
0 1 0 0 0 1 1 0 1 1 1 0 1 global signal regression
0 1 0 0 0 1 1 0 1 1 1 1 63157
0 1 0 0 0 1 1 0 1 1 1 1 0 noise correction
0 1 0 0 0 1 1 0 1 1 1 1 1 49979
0 1 0 0 0 1 1 0 1 1 1 1 1 0 physiological noise
0 1 0 0 0 1 1 0 1 1 1 1 1 1 cardiac gating
0 1 0 0 0 1 1 1 75107
0 1 0 0 0 1 1 1 0 rip
0 1 0 0 0 1 1 1 1 71122
0 1 0 0 0 1 1 1 1 0 clip
0 1 0 0 0 1 1 1 1 1 64938
0 1 0 0 0 1 1 1 1 1 0 clipping
0 1 0 0 0 1 1 1 1 1 1 gentle handling
0 1 0 0 1 76049
0 1 0 0 1 0 75973
0 1 0 0 1 0 0 75692
0 1 0 0 1 0 0 0 71106
0 1 0 0 1 0 0 0 0 network meta-analysis
0 1 0 0 1 0 0 0 1 comparator
0 1 0 0 1 0 0 1 74930
0 1 0 0 1 0 0 1 0 meta analysis
0 1 0 0 1 0 0 1 1 mint
0 1 0 0 1 0 1 75862
0 1 0 0 1 0 1 0 75171
0 1 0 0 1 0 1 0 0 62137
0 1 0 0 1 0 1 0 0 0 multiplication
0 1 0 0 1 0 1 0 0 1 56845
0 1 0 0 1 0 1 0 0 1 0 arithmetic
0 1 0 0 1 0 1 0 0 1 1 subtraction
0 1 0 0 1 0 1 0 1 73031
0 1 0 0 1 0 1 0 1 0 66646
0 1 0 0 1 0 1 0 1 0 0 monte carlo
0 1 0 0 1 0 1 0 1 0 1 resampling
0 1 0 0 1 0 1 0 1 1 67378
0 1 0 0 1 0 1 0 1 1 0 determination
0 1 0 0 1 0 1 0 1 1 1 57504
0 1 0 0 1 0 1 0 1 1 1 0 estimation
0 1 0 0 1 0 1 0 1 1 1 1 calculation
0 1 0 0 1 0 1 1 75825
0 1 0 0 1 0 1 1 0 73613
0 1 0 0 1 0 1 1 0 0 65313
0 1 0 0 1 0 1 1 0 0 0 hybrid model
0 1 0 0 1 0 1 1 0 0 1 39533
0 1 0 0 1 0 1 1 0 0 1 0 forecasting
0 1 0 0 1 0 1 1 0 0 1 1 forecast
0 1 0 0 1 0 1 1 0 1 69031
0 1 0 0 1 0 1 1 0 1 0 time-series analysis
0 1 0 0 1 0 1 1 0 1 1 time trends
0 1 0 0 1 0 1 1 1 75771
0 1 0 0 1 0 1 1 1 0 75491
0 1 0 0 1 0 1 1 1 0 0 73460
0 1 0 0 1 0 1 1 1 0 0 0 42868
0 1 0 0 1 0 1 1 1 0 0 0 0 kurtosis
0 1 0 0 1 0 1 1 1 0 0 0 1 skewness
0 1 0 0 1 0 1 1 1 0 0 1 68284
0 1 0 0 1 0 1 1 1 0 0 1 0 lognormal
0 1 0 0 1 0 1 1 1 0 0 1 1 48302
0 1 0 0 1 0 1 1 1 0 0 1 1 0 bimodal
0 1 0 0 1 0 1 1 1 0 0 1 1 1 unimodal
0 1 0 0 1 0 1 1 1 0 1 74608
0 1 0 0 1 0 1 1 1 0 1 0 68735
0 1 0 0 1 0 1 1 1 0 1 0 0 covariance analysis
0 1 0 0 1 0 1 1 1 0 1 0 1 task effects
0 1 0 0 1 0 1 1 1 0 1 1 73484
0 1 0 0 1 0 1 1 1 0 1 1 0 71090
0 1 0 0 1 0 1 1 1 0 1 1 0 0 52986
0 1 0 0 1 0 1 1 1 0 1 1 0 0 0 partial correlation
0 1 0 0 1 0 1 1 1 0 1 1 0 0 1 correlation matrix
0 1 0 0 1 0 1 1 1 0 1 1 0 1 63449
0 1 0 0 1 0 1 1 1 0 1 1 0 1 0 covariation
0 1 0 0 1 0 1 1 1 0 1 1 0 1 1 53513
0 1 0 0 1 0 1 1 1 0 1 1 0 1 1 0 variance
0 1 0 0 1 0 1 1 1 0 1 1 0 1 1 1 covariance
0 1 0 0 1 0 1 1 1 0 1 1 1 72348
0 1 0 0 1 0 1 1 1 0 1 1 1 0 spatial correlation
0 1 0 0 1 0 1 1 1 0 1 1 1 1 42369
0 1 0 0 1 0 1 1 1 0 1 1 1 1 0 anticorrelation
0 1 0 0 1 0 1 1 1 0 1 1 1 1 1 anti-correlation
0 1 0 0 1 0 1 1 1 1 75570
0 1 0 0 1 0 1 1 1 1 0 75243
0 1 0 0 1 0 1 1 1 1 0 0 70821
0 1 0 0 1 0 1 1 1 1 0 0 0 collinearity
0 1 0 0 1 0 1 1 1 1 0 0 1 64796
0 1 0 0 1 0 1 1 1 1 0 0 1 0 47291
0 1 0 0 1 0 1 1 1 1 0 0 1 0 0 mediation
0 1 0 0 1 0 1 1 1 1 0 0 1 0 1 moderation
0 1 0 0 1 0 1 1 1 1 0 0 1 1 54143
0 1 0 0 1 0 1 1 1 1 0 0 1 1 0 moderator
0 1 0 0 1 0 1 1 1 1 0 0 1 1 1 moderators
0 1 0 0 1 0 1 1 1 1 0 1 74537
0 1 0 0 1 0 1 1 1 1 0 1 0 63533
0 1 0 0 1 0 1 1 1 1 0 1 0 0 time factors
0 1 0 0 1 0 1 1 1 1 0 1 0 1 39219
0 1 0 0 1 0 1 1 1 1 0 1 0 1 0 treatment effects
0 1 0 0 1 0 1 1 1 1 0 1 0 1 1 treatment effect
0 1 0 0 1 0 1 1 1 1 0 1 1 72153
0 1 0 0 1 0 1 1 1 1 0 1 1 0 group membership
0 1 0 0 1 0 1 1 1 1 0 1 1 1 57911
0 1 0 0 1 0 1 1 1 1 0 1 1 1 0 neural predictors
0 1 0 0 1 0 1 1 1 1 0 1 1 1 1 response to intervention
0 1 0 0 1 0 1 1 1 1 1 75348
0 1 0 0 1 0 1 1 1 1 1 0 73297
0 1 0 0 1 0 1 1 1 1 1 0 0 cumulative risk
0 1 0 0 1 0 1 1 1 1 1 0 1 predictive analysis
0 1 0 0 1 0 1 1 1 1 1 1 74840
0 1 0 0 1 0 1 1 1 1 1 1 0 73642
0 1 0 0 1 0 1 1 1 1 1 1 0 0 71010
0 1 0 0 1 0 1 1 1 1 1 1 0 0 0 gene set analysis
0 1 0 0 1 0 1 1 1 1 1 1 0 0 1 55287
0 1 0 0 1 0 1 1 1 1 1 1 0 0 1 0 empirical bayes
0 1 0 0 1 0 1 1 1 1 1 1 0 0 1 1 41188
0 1 0 0 1 0 1 1 1 1 1 1 0 0 1 1 0 r package
0 1 0 0 1 0 1 1 1 1 1 1 0 0 1 1 1 bioconductor
0 1 0 0 1 0 1 1 1 1 1 1 0 1 71482
0 1 0 0 1 0 1 1 1 1 1 1 0 1 0 64493
0 1 0 0 1 0 1 1 1 1 1 1 0 1 0 0 59250
0 1 0 0 1 0 1 1 1 1 1 1 0 1 0 0 0 lsd
0 1 0 0 1 0 1 1 1 1 1 1 0 1 0 0 1 54596
0 1 0 0 1 0 1 1 1 1 1 1 0 1 0 0 1 0 degrees of freedom
0 1 0 0 1 0 1 1 1 1 1 1 0 1 0 0 1 1 39747
0 1 0 0 1 0 1 1 1 1 1 1 0 1 0 0 1 1 0 repeated measures
0 1 0 0 1 0 1 1 1 1 1 1 0 1 0 0 1 1 1 39201
0 1 0 0 1 0 1 1 1 1 1 1 0 1 0 0 1 1 1 0 analysis of variance
0 1 0 0 1 0 1 1 1 1 1 1 0 1 0 0 1 1 1 1 multiple comparisons
0 1 0 0 1 0 1 1 1 1 1 1 0 1 0 1 63292
0 1 0 0 1 0 1 1 1 1 1 1 0 1 0 1 0 45970
0 1 0 0 1 0 1 1 1 1 1 1 0 1 0 1 0 0 statistical
0 1 0 0 1 0 1 1 1 1 1 1 0 1 0 1 0 1 student
0 1 0 0 1 0 1 1 1 1 1 1 0 1 0 1 1 56588
0 1 0 0 1 0 1 1 1 1 1 1 0 1 0 1 1 0 rank
0 1 0 0 1 0 1 1 1 1 1 1 0 1 0 1 1 1 40537
0 1 0 0 1 0 1 1 1 1 1 1 0 1 0 1 1 1 0 nonparametric
0 1 0 0 1 0 1 1 1 1 1 1 0 1 0 1 1 1 1 parametric
0 1 0 0 1 0 1 1 1 1 1 1 0 1 1 68592
0 1 0 0 1 0 1 1 1 1 1 1 0 1 1 0 48567
0 1 0 0 1 0 1 1 1 1 1 1 0 1 1 0 0 adjustment
0 1 0 0 1 0 1 1 1 1 1 1 0 1 1 0 1 correction
0 1 0 0 1 0 1 1 1 1 1 1 0 1 1 1 66893
0 1 0 0 1 0 1 1 1 1 1 1 0 1 1 1 0 53339
0 1 0 0 1 0 1 1 1 1 1 1 0 1 1 1 0 0 random field theory
0 1 0 0 1 0 1 1 1 1 1 1 0 1 1 1 0 1 family-wise error rate
0 1 0 0 1 0 1 1 1 1 1 1 0 1 1 1 1 63712
0 1 0 0 1 0 1 1 1 1 1 1 0 1 1 1 1 0 hypothesis testing
0 1 0 0 1 0 1 1 1 1 1 1 0 1 1 1 1 1 55906
0 1 0 0 1 0 1 1 1 1 1 1 0 1 1 1 1 1 0 permutation
0 1 0 0 1 0 1 1 1 1 1 1 0 1 1 1 1 1 1 46972
0 1 0 0 1 0 1 1 1 1 1 1 0 1 1 1 1 1 1 0 multiple testing
0 1 0 0 1 0 1 1 1 1 1 1 0 1 1 1 1 1 1 1 42395
0 1 0 0 1 0 1 1 1 1 1 1 0 1 1 1 1 1 1 1 0 false discovery rate
0 1 0 0 1 0 1 1 1 1 1 1 0 1 1 1 1 1 1 1 1 p-value
0 1 0 0 1 0 1 1 1 1 1 1 1 73744
0 1 0 0 1 0 1 1 1 1 1 1 1 0 71536
0 1 0 0 1 0 1 1 1 1 1 1 1 0 0 68536
0 1 0 0 1 0 1 1 1 1 1 1 1 0 0 0 quantile regression
0 1 0 0 1 0 1 1 1 1 1 1 1 0 0 1 63021
0 1 0 0 1 0 1 1 1 1 1 1 1 0 0 1 0 39555
0 1 0 0 1 0 1 1 1 1 1 1 1 0 0 1 0 0 multivariate regression
0 1 0 0 1 0 1 1 1 1 1 1 1 0 0 1 0 1 cox regression
0 1 0 0 1 0 1 1 1 1 1 1 1 0 0 1 1 58791
0 1 0 0 1 0 1 1 1 1 1 1 1 0 0 1 1 0 robust regression
0 1 0 0 1 0 1 1 1 1 1 1 1 0 0 1 1 1 51076
0 1 0 0 1 0 1 1 1 1 1 1 1 0 0 1 1 1 0 40572
0 1 0 0 1 0 1 1 1 1 1 1 1 0 0 1 1 1 0 0 regression
0 1 0 0 1 0 1 1 1 1 1 1 1 0 0 1 1 1 0 1 linear regression
0 1 0 0 1 0 1 1 1 1 1 1 1 0 0 1 1 1 1 45563
0 1 0 0 1 0 1 1 1 1 1 1 1 0 0 1 1 1 1 0 regression models
0 1 0 0 1 0 1 1 1 1 1 1 1 0 0 1 1 1 1 1 44301
0 1 0 0 1 0 1 1 1 1 1 1 1 0 0 1 1 1 1 1 0 multiple regression
0 1 0 0 1 0 1 1 1 1 1 1 1 0 0 1 1 1 1 1 1 multiple linear regression
0 1 0 0 1 0 1 1 1 1 1 1 1 0 1 69432
0 1 0 0 1 0 1 1 1 1 1 1 1 0 1 0 61889
0 1 0 0 1 0 1 1 1 1 1 1 1 0 1 0 0 58517
0 1 0 0 1 0 1 1 1 1 1 1 1 0 1 0 0 0 multiple imputation
0 1 0 0 1 0 1 1 1 1 1 1 1 0 1 0 0 1 55051
0 1 0 0 1 0 1 1 1 1 1 1 1 0 1 0 0 1 0 propensity score
0 1 0 0 1 0 1 1 1 1 1 1 1 0 1 0 0 1 1 48134
0 1 0 0 1 0 1 1 1 1 1 1 1 0 1 0 0 1 1 0 covariate adjustment
0 1 0 0 1 0 1 1 1 1 1 1 1 0 1 0 0 1 1 1 inverse probability weighting
0 1 0 0 1 0 1 1 1 1 1 1 1 0 1 0 1 59905
0 1 0 0 1 0 1 1 1 1 1 1 1 0 1 0 1 0 logistic models
0 1 0 0 1 0 1 1 1 1 1 1 1 0 1 0 1 1 52483
0 1 0 0 1 0 1 1 1 1 1 1 1 0 1 0 1 1 0 proportional hazards models
0 1 0 0 1 0 1 1 1 1 1 1 1 0 1 0 1 1 1 conditional logistic regression
0 1 0 0 1 0 1 1 1 1 1 1 1 0 1 1 61924
0 1 0 0 1 0 1 1 1 1 1 1 1 0 1 1 0 40398
0 1 0 0 1 0 1 1 1 1 1 1 1 0 1 1 0 0 hazard ratio
0 1 0 0 1 0 1 1 1 1 1 1 1 0 1 1 0 1 39517
0 1 0 0 1 0 1 1 1 1 1 1 1 0 1 1 0 1 0 odds ratio
0 1 0 0 1 0 1 1 1 1 1 1 1 0 1 1 0 1 1 relative risk
0 1 0 0 1 0 1 1 1 1 1 1 1 0 1 1 1 53127
0 1 0 0 1 0 1 1 1 1 1 1 1 0 1 1 1 0 se	standard error
0 1 0 0 1 0 1 1 1 1 1 1 1 0 1 1 1 1 41185
0 1 0 0 1 0 1 1 1 1 1 1 1 0 1 1 1 1 0 ci	confidence interval
0 1 0 0 1 0 1 1 1 1 1 1 1 0 1 1 1 1 1 or	odds ratio
0 1 0 0 1 0 1 1 1 1 1 1 1 1 72419
0 1 0 0 1 0 1 1 1 1 1 1 1 1 0 66005
0 1 0 0 1 0 1 1 1 1 1 1 1 1 0 0 47330
0 1 0 0 1 0 1 1 1 1 1 1 1 1 0 0 0 latent variable
0 1 0 0 1 0 1 1 1 1 1 1 1 1 0 0 1 latent variables
0 1 0 0 1 0 1 1 1 1 1 1 1 1 0 1 47989
0 1 0 0 1 0 1 1 1 1 1 1 1 1 0 1 0 structural equation model
0 1 0 0 1 0 1 1 1 1 1 1 1 1 0 1 1 45852
0 1 0 0 1 0 1 1 1 1 1 1 1 1 0 1 1 0 structural equation models
0 1 0 0 1 0 1 1 1 1 1 1 1 1 0 1 1 1 44189
0 1 0 0 1 0 1 1 1 1 1 1 1 1 0 1 1 1 0 structural equation modeling (sem)
0 1 0 0 1 0 1 1 1 1 1 1 1 1 0 1 1 1 1 42786
0 1 0 0 1 0 1 1 1 1 1 1 1 1 0 1 1 1 1 0 structural equation modeling
0 1 0 0 1 0 1 1 1 1 1 1 1 1 0 1 1 1 1 1 structural equation modelling
0 1 0 0 1 0 1 1 1 1 1 1 1 1 1 71166
0 1 0 0 1 0 1 1 1 1 1 1 1 1 1 0 65143
0 1 0 0 1 0 1 1 1 1 1 1 1 1 1 0 0 47417
0 1 0 0 1 0 1 1 1 1 1 1 1 1 1 0 0 0 generalized linear model
0 1 0 0 1 0 1 1 1 1 1 1 1 1 1 0 0 1 glm
0 1 0 0 1 0 1 1 1 1 1 1 1 1 1 0 1 59650
0 1 0 0 1 0 1 1 1 1 1 1 1 1 1 0 1 0 mixed effects
0 1 0 0 1 0 1 1 1 1 1 1 1 1 1 0 1 1 57697
0 1 0 0 1 0 1 1 1 1 1 1 1 1 1 0 1 1 0 51040
0 1 0 0 1 0 1 1 1 1 1 1 1 1 1 0 1 1 0 0 mixed effects models
0 1 0 0 1 0 1 1 1 1 1 1 1 1 1 0 1 1 0 1 44717
0 1 0 0 1 0 1 1 1 1 1 1 1 1 1 0 1 1 0 1 0 hierarchical linear modeling
0 1 0 0 1 0 1 1 1 1 1 1 1 1 1 0 1 1 0 1 1 42944
0 1 0 0 1 0 1 1 1 1 1 1 1 1 1 0 1 1 0 1 1 0 multilevel modeling
0 1 0 0 1 0 1 1 1 1 1 1 1 1 1 0 1 1 0 1 1 1 multilevel models
0 1 0 0 1 0 1 1 1 1 1 1 1 1 1 0 1 1 1 53500
0 1 0 0 1 0 1 1 1 1 1 1 1 1 1 0 1 1 1 0 gee
0 1 0 0 1 0 1 1 1 1 1 1 1 1 1 0 1 1 1 1 47822
0 1 0 0 1 0 1 1 1 1 1 1 1 1 1 0 1 1 1 1 0 random effects
0 1 0 0 1 0 1 1 1 1 1 1 1 1 1 0 1 1 1 1 1 41405
0 1 0 0 1 0 1 1 1 1 1 1 1 1 1 0 1 1 1 1 1 0 mixed model
0 1 0 0 1 0 1 1 1 1 1 1 1 1 1 0 1 1 1 1 1 1 40149
0 1 0 0 1 0 1 1 1 1 1 1 1 1 1 0 1 1 1 1 1 1 0 linear mixed models
0 1 0 0 1 0 1 1 1 1 1 1 1 1 1 0 1 1 1 1 1 1 1 linear mixed model
0 1 0 0 1 0 1 1 1 1 1 1 1 1 1 1 69461
0 1 0 0 1 0 1 1 1 1 1 1 1 1 1 1 0 53183
0 1 0 0 1 0 1 1 1 1 1 1 1 1 1 1 0 0 growth mixture modeling
0 1 0 0 1 0 1 1 1 1 1 1 1 1 1 1 0 1 43316
0 1 0 0 1 0 1 1 1 1 1 1 1 1 1 1 0 1 0 latent class analysis
0 1 0 0 1 0 1 1 1 1 1 1 1 1 1 1 0 1 1 latent profile analysis
0 1 0 0 1 0 1 1 1 1 1 1 1 1 1 1 1 64759
0 1 0 0 1 0 1 1 1 1 1 1 1 1 1 1 1 0 longitudinal data analysis
0 1 0 0 1 0 1 1 1 1 1 1 1 1 1 1 1 1 56134
0 1 0 0 1 0 1 1 1 1 1 1 1 1 1 1 1 1 0 global test statistic
0 1 0 0 1 0 1 1 1 1 1 1 1 1 1 1 1 1 1 43904
0 1 0 0 1 0 1 1 1 1 1 1 1 1 1 1 1 1 1 0 functional principal component analysis
0 1 0 0 1 0 1 1 1 1 1 1 1 1 1 1 1 1 1 1 functional regression
0 1 0 0 1 1 76006
0 1 0 0 1 1 0 75934
0 1 0 0 1 1 0 0 75799
0 1 0 0 1 1 0 0 0 75429
0 1 0 0 1 1 0 0 0 0 74328
0 1 0 0 1 1 0 0 0 0 0 72257
0 1 0 0 1 1 0 0 0 0 0 0 69402
0 1 0 0 1 1 0 0 0 0 0 0 0 39448
0 1 0 0 1 1 0 0 0 0 0 0 0 0 time course
0 1 0 0 1 1 0 0 0 0 0 0 0 1 time-course
0 1 0 0 1 1 0 0 0 0 0 0 1 67883
0 1 0 0 1 1 0 0 0 0 0 0 1 0 54202
0 1 0 0 1 1 0 0 0 0 0 0 1 0 0 deactivation
0 1 0 0 1 1 0 0 0 0 0 0 1 0 1 45925
0 1 0 0 1 1 0 0 0 0 0 0 1 0 1 0 decay
0 1 0 0 1 1 0 0 0 0 0 0 1 0 1 1 time constant
0 1 0 0 1 1 0 0 0 0 0 0 1 1 56376
0 1 0 0 1 1 0 0 0 0 0 0 1 1 0 michaelis-menten
0 1 0 0 1 1 0 0 0 0 0 0 1 1 1 44888
0 1 0 0 1 1 0 0 0 0 0 0 1 1 1 0 kinetics
0 1 0 0 1 1 0 0 0 0 0 0 1 1 1 1 kinetic
0 1 0 0 1 1 0 0 0 0 0 1 70748
0 1 0 0 1 1 0 0 0 0 0 1 0 saturation
0 1 0 0 1 1 0 0 0 0 0 1 1 56509
0 1 0 0 1 1 0 0 0 0 0 1 1 0 equilibrium
0 1 0 0 1 1 0 0 0 0 0 1 1 1 39522
0 1 0 0 1 1 0 0 0 0 0 1 1 1 0 steady state
0 1 0 0 1 1 0 0 0 0 0 1 1 1 1 steady-state
0 1 0 0 1 1 0 0 0 0 1 73407
0 1 0 0 1 1 0 0 0 0 1 0 63296
0 1 0 0 1 1 0 0 0 0 1 0 0 trace
0 1 0 0 1 1 0 0 0 0 1 0 1 52787
0 1 0 0 1 1 0 0 0 0 1 0 1 0 pulse
0 1 0 0 1 1 0 0 0 0 1 0 1 1 ramp
0 1 0 0 1 1 0 0 0 0 1 1 65745
0 1 0 0 1 1 0 0 0 0 1 1 0 biphasic
0 1 0 0 1 1 0 0 0 0 1 1 1 inflection
0 1 0 0 1 1 0 0 0 1 75011
0 1 0 0 1 1 0 0 0 1 0 67516
0 1 0 0 1 1 0 0 0 1 0 0 44569
0 1 0 0 1 1 0 0 0 1 0 0 0 dose-response relationship
0 1 0 0 1 1 0 0 0 1 0 0 1 40199
0 1 0 0 1 1 0 0 0 1 0 0 1 0 dose&#x2013;response
0 1 0 0 1 1 0 0 0 1 0 0 1 1 39317
0 1 0 0 1 1 0 0 0 1 0 0 1 1 0 dose-response
0 1 0 0 1 1 0 0 0 1 0 0 1 1 1 dose response
0 1 0 0 1 1 0 0 0 1 0 1 64655
0 1 0 0 1 1 0 0 0 1 0 1 0 ld50
0 1 0 0 1 1 0 0 0 1 0 1 1 58601
0 1 0 0 1 1 0 0 0 1 0 1 1 0 concentration
0 1 0 0 1 1 0 0 0 1 0 1 1 1 49959
0 1 0 0 1 1 0 0 0 1 0 1 1 1 0 effective dose
0 1 0 0 1 1 0 0 0 1 0 1 1 1 1 39129
0 1 0 0 1 1 0 0 0 1 0 1 1 1 1 0 dose
0 1 0 0 1 1 0 0 0 1 0 1 1 1 1 1 dosage
0 1 0 0 1 1 0 0 0 1 1 69362
0 1 0 0 1 1 0 0 0 1 1 0 40914
0 1 0 0 1 1 0 0 0 1 1 0 0 mixture
0 1 0 0 1 1 0 0 0 1 1 0 1 mixtures
0 1 0 0 1 1 0 0 0 1 1 1 48180
0 1 0 0 1 1 0 0 0 1 1 1 0 ratio
0 1 0 0 1 1 0 0 0 1 1 1 1 molar
0 1 0 0 1 1 0 0 1 75720
0 1 0 0 1 1 0 0 1 0 70381
0 1 0 0 1 1 0 0 1 0 0 loading
0 1 0 0 1 1 0 0 1 0 1 38339
0 1 0 0 1 1 0 0 1 0 1 0 positive
0 1 0 0 1 1 0 0 1 0 1 1 negative
0 1 0 0 1 1 0 0 1 1 75129
0 1 0 0 1 1 0 0 1 1 0 71505
0 1 0 0 1 1 0 0 1 1 0 0 enrichment
0 1 0 0 1 1 0 0 1 1 0 1 62143
0 1 0 0 1 1 0 0 1 1 0 1 0 occupancy
0 1 0 0 1 1 0 0 1 1 0 1 1 density
0 1 0 0 1 1 0 0 1 1 1 75045
0 1 0 0 1 1 0 0 1 1 1 0 68173
0 1 0 0 1 1 0 0 1 1 1 0 0 profile
0 1 0 0 1 1 0 0 1 1 1 0 1 62619
0 1 0 0 1 1 0 0 1 1 1 0 1 0 distribution
0 1 0 0 1 1 0 0 1 1 1 0 1 1 39662
0 1 0 0 1 1 0 0 1 1 1 0 1 1 0 pattern
0 1 0 0 1 1 0 0 1 1 1 0 1 1 1 patterns
0 1 0 0 1 1 0 0 1 1 1 1 74460
0 1 0 0 1 1 0 0 1 1 1 1 0 68420
0 1 0 0 1 1 0 0 1 1 1 1 0 0 45540
0 1 0 0 1 1 0 0 1 1 1 1 0 0 0 expressions
0 1 0 0 1 1 0 0 1 1 1 1 0 0 1 protein levels
0 1 0 0 1 1 0 0 1 1 1 1 0 1 55047
0 1 0 0 1 1 0 0 1 1 1 1 0 1 0 content
0 1 0 0 1 1 0 0 1 1 1 1 0 1 1 levels
0 1 0 0 1 1 0 0 1 1 1 1 1 70829
0 1 0 0 1 1 0 0 1 1 1 1 1 0 63111
0 1 0 0 1 1 0 0 1 1 1 1 1 0 0 absolute
0 1 0 0 1 1 0 0 1 1 1 1 1 0 1 47672
0 1 0 0 1 1 0 0 1 1 1 1 1 0 1 0 amplitude
0 1 0 0 1 1 0 0 1 1 1 1 1 0 1 1 magnitude
0 1 0 0 1 1 0 0 1 1 1 1 1 1 67856
0 1 0 0 1 1 0 0 1 1 1 1 1 1 0 39023
0 1 0 0 1 1 0 0 1 1 1 1 1 1 0 0 trends
0 1 0 0 1 1 0 0 1 1 1 1 1 1 0 1 trend
0 1 0 0 1 1 0 0 1 1 1 1 1 1 1 56729
0 1 0 0 1 1 0 0 1 1 1 1 1 1 1 0 change
0 1 0 0 1 1 0 0 1 1 1 1 1 1 1 1 shift
0 1 0 0 1 1 0 1 75819
0 1 0 0 1 1 0 1 0 75337
0 1 0 0 1 1 0 1 0 0 71297
0 1 0 0 1 1 0 1 0 0 0 chemosensitivity
0 1 0 0 1 1 0 1 0 0 1 62976
0 1 0 0 1 1 0 1 0 0 1 0 response
0 1 0 0 1 1 0 1 0 0 1 1 47203
0 1 0 0 1 1 0 1 0 0 1 1 0 sensitivity
0 1 0 0 1 1 0 1 0 0 1 1 1 responsiveness
0 1 0 0 1 1 0 1 0 1 73233
0 1 0 0 1 1 0 1 0 1 0 visual response
0 1 0 0 1 1 0 1 0 1 1 mlr
0 1 0 0 1 1 0 1 1 75574
0 1 0 0 1 1 0 1 1 0 73678
0 1 0 0 1 1 0 1 1 0 0 hdr
0 1 0 0 1 1 0 1 1 0 1 63972
0 1 0 0 1 1 0 1 1 0 1 0 efficiency
0 1 0 0 1 1 0 1 1 0 1 1 rate
0 1 0 0 1 1 0 1 1 1 74620
0 1 0 0 1 1 0 1 1 1 0 63356
0 1 0 0 1 1 0 1 1 1 0 0 response rate
0 1 0 0 1 1 0 1 1 1 0 1 event rate
0 1 0 0 1 1 0 1 1 1 1 73871
0 1 0 0 1 1 0 1 1 1 1 0 group size
0 1 0 0 1 1 0 1 1 1 1 1 46297
0 1 0 0 1 1 0 1 1 1 1 1 0 attrition
0 1 0 0 1 1 0 1 1 1 1 1 1 dropout
0 1 0 0 1 1 1 75976
0 1 0 0 1 1 1 0 74509
0 1 0 0 1 1 1 0 0 chimaera
0 1 0 0 1 1 1 0 1 str
0 1 0 0 1 1 1 1 75839
0 1 0 0 1 1 1 1 0 75545
0 1 0 0 1 1 1 1 0 0 73579
0 1 0 0 1 1 1 1 0 0 0 40110
0 1 0 0 1 1 1 1 0 0 0 0 group 3
0 1 0 0 1 1 1 1 0 0 0 1 group 4
0 1 0 0 1 1 1 1 0 0 1 71443
0 1 0 0 1 1 1 1 0 0 1 0 50722
0 1 0 0 1 1 1 1 0 0 1 0 0 40197
0 1 0 0 1 1 1 1 0 0 1 0 0 0 4
0 1 0 0 1 1 1 1 0 0 1 0 0 1 5
0 1 0 0 1 1 1 1 0 0 1 0 1 40644
0 1 0 0 1 1 1 1 0 0 1 0 1 0 1
0 1 0 0 1 1 1 1 0 0 1 0 1 1 38935
0 1 0 0 1 1 1 1 0 0 1 0 1 1 0 3
0 1 0 0 1 1 1 1 0 0 1 0 1 1 1 2
0 1 0 0 1 1 1 1 0 0 1 1 62012
0 1 0 0 1 1 1 1 0 0 1 1 0 grade
0 1 0 0 1 1 1 1 0 0 1 1 1 score
0 1 0 0 1 1 1 1 0 1 74339
0 1 0 0 1 1 1 1 0 1 0 62731
0 1 0 0 1 1 1 1 0 1 0 0 zip
0 1 0 0 1 1 1 1 0 1 0 1 pdf
0 1 0 0 1 1 1 1 0 1 1 72104
0 1 0 0 1 1 1 1 0 1 1 0 q42
0 1 0 0 1 1 1 1 0 1 1 1 62892
0 1 0 0 1 1 1 1 0 1 1 1 0 s6
0 1 0 0 1 1 1 1 0 1 1 1 1 51641
0 1 0 0 1 1 1 1 0 1 1 1 1 0 si
0 1 0 0 1 1 1 1 0 1 1 1 1 1 42245
0 1 0 0 1 1 1 1 0 1 1 1 1 1 0 s1
0 1 0 0 1 1 1 1 0 1 1 1 1 1 1 appendix
0 1 0 0 1 1 1 1 1 75736
0 1 0 0 1 1 1 1 1 0 72488
0 1 0 0 1 1 1 1 1 0 0 codon usage
0 1 0 0 1 1 1 1 1 0 1 h1
0 1 0 0 1 1 1 1 1 1 74849
0 1 0 0 1 1 1 1 1 1 0 73954
0 1 0 0 1 1 1 1 1 1 0 0 64109
0 1 0 0 1 1 1 1 1 1 0 0 0 a1
0 1 0 0 1 1 1 1 1 1 0 0 1 baf
0 1 0 0 1 1 1 1 1 1 0 1 69440
0 1 0 0 1 1 1 1 1 1 0 1 0 39665
0 1 0 0 1 1 1 1 1 1 0 1 0 0 d3
0 1 0 0 1 1 1 1 1 1 0 1 0 1 38716
0 1 0 0 1 1 1 1 1 1 0 1 0 1 0 d2
0 1 0 0 1 1 1 1 1 1 0 1 0 1 1 d1
0 1 0 0 1 1 1 1 1 1 0 1 1 53789
0 1 0 0 1 1 1 1 1 1 0 1 1 0 c6
0 1 0 0 1 1 1 1 1 1 0 1 1 1 46067
0 1 0 0 1 1 1 1 1 1 0 1 1 1 0 38307
0 1 0 0 1 1 1 1 1 1 0 1 1 1 0 0 c1
0 1 0 0 1 1 1 1 1 1 0 1 1 1 0 1 c2
0 1 0 0 1 1 1 1 1 1 0 1 1 1 1 40287
0 1 0 0 1 1 1 1 1 1 0 1 1 1 1 0 c3
0 1 0 0 1 1 1 1 1 1 0 1 1 1 1 1 c4
0 1 0 0 1 1 1 1 1 1 1 74815
0 1 0 0 1 1 1 1 1 1 1 0 42691
0 1 0 0 1 1 1 1 1 1 1 0 0 l1
0 1 0 0 1 1 1 1 1 1 1 0 1 l2
0 1 0 0 1 1 1 1 1 1 1 1 71972
0 1 0 0 1 1 1 1 1 1 1 1 0 r1
0 1 0 0 1 1 1 1 1 1 1 1 1 k2
0 1 0 1 76067
0 1 0 1 0 76048
0 1 0 1 0 0 76019
0 1 0 1 0 0 0 75627
0 1 0 1 0 0 0 0 74187
0 1 0 1 0 0 0 0 0 cie
0 1 0 1 0 0 0 0 1 65841
0 1 0 1 0 0 0 0 1 0 38076
0 1 0 1 0 0 0 0 1 0 0 color
0 1 0 1 0 0 0 0 1 0 1 colour
0 1 0 1 0 0 0 0 1 1 57766
0 1 0 1 0 0 0 0 1 1 0 chromatic
0 1 0 1 0 0 0 0 1 1 1 hue
0 1 0 1 0 0 0 1 74602
0 1 0 1 0 0 0 1 0 pointing
0 1 0 1 0 0 0 1 1 66667
0 1 0 1 0 0 0 1 1 0 drawing
0 1 0 1 0 0 0 1 1 1 painting
0 1 0 1 0 0 1 75913
0 1 0 1 0 0 1 0 75598
0 1 0 1 0 0 1 0 0 73362
0 1 0 1 0 0 1 0 0 0 neuronal hypertrophy
0 1 0 1 0 0 1 0 0 1 von economo neurons
0 1 0 1 0 0 1 0 1 75316
0 1 0 1 0 0 1 0 1 0 73802
0 1 0 1 0 0 1 0 1 0 0 71865
0 1 0 1 0 0 1 0 1 0 0 0 enumeration
0 1 0 1 0 0 1 0 1 0 0 1 62561
0 1 0 1 0 0 1 0 1 0 0 1 0 46877
0 1 0 1 0 0 1 0 1 0 0 1 0 0 nucleator
0 1 0 1 0 0 1 0 1 0 0 1 0 1 39142
0 1 0 1 0 0 1 0 1 0 0 1 0 1 0 fractionator
0 1 0 1 0 0 1 0 1 0 0 1 0 1 1 disector
0 1 0 1 0 0 1 0 1 0 0 1 1 60699
0 1 0 1 0 0 1 0 1 0 0 1 1 0 isotropic fractionator
0 1 0 1 0 0 1 0 1 0 0 1 1 1 58371
0 1 0 1 0 0 1 0 1 0 0 1 1 1 0 counting
0 1 0 1 0 0 1 0 1 0 0 1 1 1 1 45269
0 1 0 1 0 0 1 0 1 0 0 1 1 1 1 0 design-based stereology
0 1 0 1 0 0 1 0 1 0 0 1 1 1 1 1 41001
0 1 0 1 0 0 1 0 1 0 0 1 1 1 1 1 0 unbiased stereology
0 1 0 1 0 0 1 0 1 0 0 1 1 1 1 1 1 optical fractionator
0 1 0 1 0 0 1 0 1 0 1 72335
0 1 0 1 0 0 1 0 1 0 1 0 64507
0 1 0 1 0 0 1 0 1 0 1 0 0 40269
0 1 0 1 0 0 1 0 1 0 1 0 0 0 fluoro-jade
0 1 0 1 0 0 1 0 1 0 1 0 0 1 fluoro-jade b
0 1 0 1 0 0 1 0 1 0 1 0 1 55280
0 1 0 1 0 0 1 0 1 0 1 0 1 0 fast blue
0 1 0 1 0 0 1 0 1 0 1 0 1 1 nissl
0 1 0 1 0 0 1 0 1 0 1 1 66311
0 1 0 1 0 0 1 0 1 0 1 1 0 neurolucida
0 1 0 1 0 0 1 0 1 0 1 1 1 58087
0 1 0 1 0 0 1 0 1 0 1 1 1 0 timm stain
0 1 0 1 0 0 1 0 1 0 1 1 1 1 41761
0 1 0 1 0 0 1 0 1 0 1 1 1 1 0 golgi stain
0 1 0 1 0 0 1 0 1 0 1 1 1 1 1 golgi-cox
0 1 0 1 0 0 1 0 1 1 74452
0 1 0 1 0 0 1 0 1 1 0 71745
0 1 0 1 0 0 1 0 1 1 0 0 54755
0 1 0 1 0 0 1 0 1 1 0 0 0 growth rate
0 1 0 1 0 0 1 0 1 1 0 0 1 cell number
0 1 0 1 0 0 1 0 1 1 0 1 61573
0 1 0 1 0 0 1 0 1 1 0 1 0 40862
0 1 0 1 0 0 1 0 1 1 0 1 0 0 number of neurons
0 1 0 1 0 0 1 0 1 1 0 1 0 1 numbers of neurons
0 1 0 1 0 0 1 0 1 1 0 1 1 46826
0 1 0 1 0 0 1 0 1 1 0 1 1 0 neuronal density
0 1 0 1 0 0 1 0 1 1 0 1 1 1 42538
0 1 0 1 0 0 1 0 1 1 0 1 1 1 0 neuron number
0 1 0 1 0 0 1 0 1 1 0 1 1 1 1 neuron density
0 1 0 1 0 0 1 0 1 1 1 72810
0 1 0 1 0 0 1 0 1 1 1 0 63245
0 1 0 1 0 0 1 0 1 1 1 0 0 large
0 1 0 1 0 0 1 0 1 1 1 0 1 60484
0 1 0 1 0 0 1 0 1 1 1 0 1 0 surface area
0 1 0 1 0 0 1 0 1 1 1 0 1 1 size
0 1 0 1 0 0 1 0 1 1 1 1 70205
0 1 0 1 0 0 1 0 1 1 1 1 0 61113
0 1 0 1 0 0 1 0 1 1 1 1 0 0 area
0 1 0 1 0 0 1 0 1 1 1 1 0 1 planimetry
0 1 0 1 0 0 1 0 1 1 1 1 1 67358
0 1 0 1 0 0 1 0 1 1 1 1 1 0 54950
0 1 0 1 0 0 1 0 1 1 1 1 1 0 0 volumetric
0 1 0 1 0 0 1 0 1 1 1 1 1 0 1 41385
0 1 0 1 0 0 1 0 1 1 1 1 1 0 1 0 volume
0 1 0 1 0 0 1 0 1 1 1 1 1 0 1 1 volumes
0 1 0 1 0 0 1 0 1 1 1 1 1 1 61782
0 1 0 1 0 0 1 0 1 1 1 1 1 1 0 morphometric
0 1 0 1 0 0 1 0 1 1 1 1 1 1 1 45101
0 1 0 1 0 0 1 0 1 1 1 1 1 1 1 0 thickness
0 1 0 1 0 0 1 0 1 1 1 1 1 1 1 1 cross-sectional area
0 1 0 1 0 0 1 1 75794
0 1 0 1 0 0 1 1 0 74524
0 1 0 1 0 0 1 1 0 0 71610
0 1 0 1 0 0 1 1 0 0 0 65031
0 1 0 1 0 0 1 1 0 0 0 0 38394
0 1 0 1 0 0 1 1 0 0 0 0 0 3d
0 1 0 1 0 0 1 1 0 0 0 0 1 2d
0 1 0 1 0 0 1 1 0 0 0 1 58673
0 1 0 1 0 0 1 1 0 0 0 1 0 38772
0 1 0 1 0 0 1 1 0 0 0 1 0 0 three-dimensional
0 1 0 1 0 0 1 1 0 0 0 1 0 1 3-dimensional
0 1 0 1 0 0 1 1 0 0 0 1 1 44575
0 1 0 1 0 0 1 1 0 0 0 1 1 0 3d model
0 1 0 1 0 0 1 1 0 0 0 1 1 1 3d models
0 1 0 1 0 0 1 1 0 0 1 70033
0 1 0 1 0 0 1 1 0 0 1 0 38315
0 1 0 1 0 0 1 1 0 0 1 0 0 projection
0 1 0 1 0 0 1 1 0 0 1 0 1 projections
0 1 0 1 0 0 1 1 0 0 1 1 60209
0 1 0 1 0 0 1 1 0 0 1 1 0 51661
0 1 0 1 0 0 1 1 0 0 1 1 0 0 3-d reconstruction
0 1 0 1 0 0 1 1 0 0 1 1 0 1 neuron tracing
0 1 0 1 0 0 1 1 0 0 1 1 1 57316
0 1 0 1 0 0 1 1 0 0 1 1 1 0 3d visualization
0 1 0 1 0 0 1 1 0 0 1 1 1 1 48492
0 1 0 1 0 0 1 1 0 0 1 1 1 1 0 3d reconstructions
0 1 0 1 0 0 1 1 0 0 1 1 1 1 1 3d rendering
0 1 0 1 0 0 1 1 0 1 74271
0 1 0 1 0 0 1 1 0 1 0 69836
0 1 0 1 0 0 1 1 0 1 0 0 clsm
0 1 0 1 0 0 1 1 0 1 0 1 64295
0 1 0 1 0 0 1 1 0 1 0 1 0 50706
0 1 0 1 0 0 1 1 0 1 0 1 0 0 phalloidin
0 1 0 1 0 0 1 1 0 1 0 1 0 1 molecular probes
0 1 0 1 0 0 1 1 0 1 0 1 1 55372
0 1 0 1 0 0 1 1 0 1 0 1 1 0 confocal
0 1 0 1 0 0 1 1 0 1 0 1 1 1 whole mount
0 1 0 1 0 0 1 1 0 1 1 72940
0 1 0 1 0 0 1 1 0 1 1 0 62814
0 1 0 1 0 0 1 1 0 1 1 0 0 46099
0 1 0 1 0 0 1 1 0 1 1 0 0 0 time-lapse
0 1 0 1 0 0 1 1 0 1 1 0 0 1 time lapse
0 1 0 1 0 0 1 1 0 1 1 0 1 51204
0 1 0 1 0 0 1 1 0 1 1 0 1 0 animation
0 1 0 1 0 0 1 1 0 1 1 0 1 1 39843
0 1 0 1 0 0 1 1 0 1 1 0 1 1 0 movies
0 1 0 1 0 0 1 1 0 1 1 0 1 1 1 38285
0 1 0 1 0 0 1 1 0 1 1 0 1 1 1 0 video
0 1 0 1 0 0 1 1 0 1 1 0 1 1 1 1 movie
0 1 0 1 0 0 1 1 0 1 1 1 70324
0 1 0 1 0 0 1 1 0 1 1 1 0 51770
0 1 0 1 0 0 1 1 0 1 1 1 0 0 pictures
0 1 0 1 0 0 1 1 0 1 1 1 0 1 phase contrast
0 1 0 1 0 0 1 1 0 1 1 1 1 63494
0 1 0 1 0 0 1 1 0 1 1 1 1 0 cybernetics
0 1 0 1 0 0 1 1 0 1 1 1 1 1 48462
0 1 0 1 0 0 1 1 0 1 1 1 1 1 0 image
0 1 0 1 0 0 1 1 0 1 1 1 1 1 1 38202
0 1 0 1 0 0 1 1 0 1 1 1 1 1 1 0 imagej
0 1 0 1 0 0 1 1 0 1 1 1 1 1 1 1 fiji
0 1 0 1 0 0 1 1 1 75617
0 1 0 1 0 0 1 1 1 0 73134
0 1 0 1 0 0 1 1 1 0 0 62456
0 1 0 1 0 0 1 1 1 0 0 0 spatial smoothing
0 1 0 1 0 0 1 1 1 0 0 1 functional data
0 1 0 1 0 0 1 1 1 0 1 73009
0 1 0 1 0 0 1 1 1 0 1 0 fsl
0 1 0 1 0 0 1 1 1 0 1 1 70919
0 1 0 1 0 0 1 1 1 0 1 1 0 58494
0 1 0 1 0 0 1 1 1 0 1 1 0 0 dartel
0 1 0 1 0 0 1 1 1 0 1 1 0 1 longitudinal registration
0 1 0 1 0 0 1 1 1 0 1 1 1 60894
0 1 0 1 0 0 1 1 1 0 1 1 1 0 statistical parametric mapping (spm)
0 1 0 1 0 0 1 1 1 0 1 1 1 1 cognitive neurology
0 1 0 1 0 0 1 1 1 1 75399
0 1 0 1 0 0 1 1 1 1 0 72781
0 1 0 1 0 0 1 1 1 1 0 0 66530
0 1 0 1 0 0 1 1 1 1 0 0 0 brain map
0 1 0 1 0 0 1 1 1 1 0 0 1 51491
0 1 0 1 0 0 1 1 1 1 0 0 1 0 brain model
0 1 0 1 0 0 1 1 1 1 0 0 1 1 brain models
0 1 0 1 0 0 1 1 1 1 0 1 69778
0 1 0 1 0 0 1 1 1 1 0 1 0 65333
0 1 0 1 0 0 1 1 1 1 0 1 0 0 51991
0 1 0 1 0 0 1 1 1 1 0 1 0 0 0 allen brain atlas
0 1 0 1 0 0 1 1 1 1 0 1 0 0 1 human brain atlas
0 1 0 1 0 0 1 1 1 1 0 1 0 1 63596
0 1 0 1 0 0 1 1 1 1 0 1 0 1 0 standard brain
0 1 0 1 0 0 1 1 1 1 0 1 0 1 1 54726
0 1 0 1 0 0 1 1 1 1 0 1 0 1 1 0 45208
0 1 0 1 0 0 1 1 1 1 0 1 0 1 1 0 0 brain atlas
0 1 0 1 0 0 1 1 1 1 0 1 0 1 1 0 1 brain template
0 1 0 1 0 0 1 1 1 1 0 1 0 1 1 1 52889
0 1 0 1 0 0 1 1 1 1 0 1 0 1 1 1 0 digital atlas
0 1 0 1 0 0 1 1 1 1 0 1 0 1 1 1 1 47455
0 1 0 1 0 0 1 1 1 1 0 1 0 1 1 1 1 0 anatomical atlas
0 1 0 1 0 0 1 1 1 1 0 1 0 1 1 1 1 1 41464
0 1 0 1 0 0 1 1 1 1 0 1 0 1 1 1 1 1 0 atlas
0 1 0 1 0 0 1 1 1 1 0 1 0 1 1 1 1 1 1 atlases
0 1 0 1 0 0 1 1 1 1 0 1 1 68894
0 1 0 1 0 0 1 1 1 1 0 1 1 0 atlas-based
0 1 0 1 0 0 1 1 1 1 0 1 1 1 62330
0 1 0 1 0 0 1 1 1 1 0 1 1 1 0 probabilistic atlas
0 1 0 1 0 0 1 1 1 1 0 1 1 1 1 white matter atlas
0 1 0 1 0 0 1 1 1 1 1 75055
0 1 0 1 0 0 1 1 1 1 1 0 70757
0 1 0 1 0 0 1 1 1 1 1 0 0 53024
0 1 0 1 0 0 1 1 1 1 1 0 0 0 whole-brain
0 1 0 1 0 0 1 1 1 1 1 0 0 1 voxel-based
0 1 0 1 0 0 1 1 1 1 1 0 1 58846
0 1 0 1 0 0 1 1 1 1 1 0 1 0 voxel
0 1 0 1 0 0 1 1 1 1 1 0 1 1 53827
0 1 0 1 0 0 1 1 1 1 1 0 1 1 0 region-of-interest
0 1 0 1 0 0 1 1 1 1 1 0 1 1 1 39506
0 1 0 1 0 0 1 1 1 1 1 0 1 1 1 0 region of interest
0 1 0 1 0 0 1 1 1 1 1 0 1 1 1 1 roi
0 1 0 1 0 0 1 1 1 1 1 1 74986
0 1 0 1 0 0 1 1 1 1 1 1 0 72151
0 1 0 1 0 0 1 1 1 1 1 1 0 0 center of mass
0 1 0 1 0 0 1 1 1 1 1 1 0 1 65771
0 1 0 1 0 0 1 1 1 1 1 1 0 1 0 spatial analysis
0 1 0 1 0 0 1 1 1 1 1 1 0 1 1 58788
0 1 0 1 0 0 1 1 1 1 1 1 0 1 1 0 spatial statistics
0 1 0 1 0 0 1 1 1 1 1 1 0 1 1 1 voronoi domain
0 1 0 1 0 0 1 1 1 1 1 1 1 73235
0 1 0 1 0 0 1 1 1 1 1 1 1 0 level set
0 1 0 1 0 0 1 1 1 1 1 1 1 1 66618
0 1 0 1 0 0 1 1 1 1 1 1 1 1 0 watershed
0 1 0 1 0 0 1 1 1 1 1 1 1 1 1 65216
0 1 0 1 0 0 1 1 1 1 1 1 1 1 1 0 contours
0 1 0 1 0 0 1 1 1 1 1 1 1 1 1 1 38509
0 1 0 1 0 0 1 1 1 1 1 1 1 1 1 1 0 boundary
0 1 0 1 0 0 1 1 1 1 1 1 1 1 1 1 1 boundaries
0 1 0 1 0 1 76046
0 1 0 1 0 1 0 76004
0 1 0 1 0 1 0 0 75888
0 1 0 1 0 1 0 0 0 75396
0 1 0 1 0 1 0 0 0 0 65436
0 1 0 1 0 1 0 0 0 0 0 38199
0 1 0 1 0 1 0 0 0 0 0 0 filter
0 1 0 1 0 1 0 0 0 0 0 1 filters
0 1 0 1 0 1 0 0 0 0 1 59769
0 1 0 1 0 1 0 0 0 0 1 0 centrifugal
0 1 0 1 0 1 0 0 0 0 1 1 41968
0 1 0 1 0 1 0 0 0 0 1 1 0 filtration
0 1 0 1 0 1 0 0 0 0 1 1 1 ultrafiltration
0 1 0 1 0 1 0 0 0 1 74367
0 1 0 1 0 1 0 0 0 1 0 66204
0 1 0 1 0 1 0 0 0 1 0 0 xenon
0 1 0 1 0 1 0 0 0 1 0 1 53330
0 1 0 1 0 1 0 0 0 1 0 1 0 argon
0 1 0 1 0 1 0 0 0 1 0 1 1 helium
0 1 0 1 0 1 0 0 0 1 1 73696
0 1 0 1 0 1 0 0 0 1 1 0 low-power
0 1 0 1 0 1 0 0 0 1 1 1 71590
0 1 0 1 0 1 0 0 0 1 1 1 0 lamp
0 1 0 1 0 1 0 0 0 1 1 1 1 69039
0 1 0 1 0 1 0 0 0 1 1 1 1 0 59967
0 1 0 1 0 1 0 0 0 1 1 1 1 0 0 immersion
0 1 0 1 0 1 0 0 0 1 1 1 1 0 1 water immersion
0 1 0 1 0 1 0 0 0 1 1 1 1 1 64745
0 1 0 1 0 1 0 0 0 1 1 1 1 1 0 laser scanning
0 1 0 1 0 1 0 0 0 1 1 1 1 1 1 59249
0 1 0 1 0 1 0 0 0 1 1 1 1 1 1 0 excitation
0 1 0 1 0 1 0 0 0 1 1 1 1 1 1 1 46416
0 1 0 1 0 1 0 0 0 1 1 1 1 1 1 1 0 diode laser
0 1 0 1 0 1 0 0 0 1 1 1 1 1 1 1 1 39752
0 1 0 1 0 1 0 0 0 1 1 1 1 1 1 1 1 0 laser
0 1 0 1 0 1 0 0 0 1 1 1 1 1 1 1 1 1 lasers
0 1 0 1 0 1 0 0 1 75543
0 1 0 1 0 1 0 0 1 0 75008
0 1 0 1 0 1 0 0 1 0 0 72026
0 1 0 1 0 1 0 0 1 0 0 0 hybrid
0 1 0 1 0 1 0 0 1 0 0 1 51799
0 1 0 1 0 1 0 0 1 0 0 1 0 trap
0 1 0 1 0 1 0 0 1 0 0 1 1 trapping
0 1 0 1 0 1 0 0 1 0 1 73878
0 1 0 1 0 1 0 0 1 0 1 0 carrier
0 1 0 1 0 1 0 0 1 0 1 1 72910
0 1 0 1 0 1 0 0 1 0 1 1 0 67923
0 1 0 1 0 1 0 0 1 0 1 1 0 0 separation
0 1 0 1 0 1 0 0 1 0 1 1 0 1 mobile
0 1 0 1 0 1 0 0 1 0 1 1 1 71669
0 1 0 1 0 1 0 0 1 0 1 1 1 0 retention
0 1 0 1 0 1 0 0 1 0 1 1 1 1 56700
0 1 0 1 0 1 0 0 1 0 1 1 1 1 0 transfer
0 1 0 1 0 1 0 0 1 0 1 1 1 1 1 exchange
0 1 0 1 0 1 0 0 1 1 75188
0 1 0 1 0 1 0 0 1 1 0 72590
0 1 0 1 0 1 0 0 1 1 0 0 analytics
0 1 0 1 0 1 0 0 1 1 0 1 68446
0 1 0 1 0 1 0 0 1 1 0 1 0 flow
0 1 0 1 0 1 0 0 1 1 0 1 1 streaming
0 1 0 1 0 1 0 0 1 1 1 73767
0 1 0 1 0 1 0 0 1 1 1 0 psi
0 1 0 1 0 1 0 0 1 1 1 1 collision
0 1 0 1 0 1 0 1 75985
0 1 0 1 0 1 0 1 0 75774
0 1 0 1 0 1 0 1 0 0 75118
0 1 0 1 0 1 0 1 0 0 0 74708
0 1 0 1 0 1 0 1 0 0 0 0 74147
0 1 0 1 0 1 0 1 0 0 0 0 0 71837
0 1 0 1 0 1 0 1 0 0 0 0 0 0 68084
[truncated: 74,073 more rows]
[truncated: 3 more columns]
