# Supplementary material for: Creating Neuroscientific Knowledge Organization System Based on Word Representation and Agglomerative Clustering Algorithm
Source: Front Neuroinform. 2020 Aug 18;14:38. doi: 10.3389/fninf.2020.00038 (PMC7461893; doi:10.3389/fninf.2020.00038)
Supplement: Supplementary file 8 [file Data_Sheet_5.CSV]

0 1 0 0 76057 data processing and modeling methods	333333
0 1 0 1 0 76048 research methods	99FF99
0 1 0 1 1 0 76026 neuron level research	66FF66
0 1 0 1 1 1 0 0 0 0 0 75696 brain monitoring	66CC66
0 1 0 1 1 1 0 0 0 0 1 75892 cognitive psychology	339933
0 1 0 1 1 1 0 0 0 1 75947 sensory-motor research	33CC33
0 1 0 1 1 1 0 0 1 75983 computational research	33FF33
0 1 0 1 1 1 0 1 0 75950 psychological research	00FF00
0 1 0 1 1 1 0 1 1 76003 social related research	00CC00
0 1 0 1 1 1 1 76040 health and society	009900
0 1 1 0 0 76041 animal model research	6699CC
0 1 1 0 1 0 0 75974 zoology and botany	336699
0 1 1 0 1 0 1 0 75906 molecular structure	669999
0 1 1 0 1 0 1 1 76012 network analysis and research	6666FF
0 1 1 0 1 1 76061 gene sequence and transcription analysis	339999
0 1 1 1 0 0 0 0 75855 brain regions and neurons	FFFF66
0 1 1 1 0 0 0 1 75912 neuron growth	FFFF33
0 1 1 1 0 0 1 1 76018 cell-cell signaling and traffic	FFFF00
0 1 1 1 0 1 0 76032 cell	CCCC33
0 1 1 1 0 1 1 0 0 75910 signaling related genes	CCCC00
0 1 1 1 0 1 1 0 1 75953 drugs and biochemistry	999900
0 1 1 1 0 1 1 1 76017 nutrition and health	999933
0 1 1 1 1 0 76039 human physiology	FF6666
0 1 1 1 1 1 0 76051 human neural system	FF3333
0 1 1 1 1 1 1 0 76043 human tissue	CC3333
0 1 1 1 1 1 1 1 0 76031 human body	CC0000
0 1 1 1 1 1 1 1 1 0 0 75989 human cell type and culture	CC3366
0 1 1 1 1 1 1 1 1 0 1 75994 drug and therapy	FF6699
0 1 1 1 1 1 1 1 1 1 76025 diseases	FF0066
